1 **An *in silico* integrative analysis of hepatocellular carcinoma omics databases shows the dual**  
2 **regulatory role of microRNAs either as tumor suppressors or as oncomirs**

3 **Mahmoud M. Tolba<sup>1,3</sup> , Bangli Soliman<sup>2, 3</sup>, Abdul Jabbar<sup>4</sup>, HebaT'Allah Nasser<sup>6</sup>,**  
4 **Mahmoud Elhefnawi<sup>2, 3</sup>**

5 <sup>1</sup>Pharmaceutical Division, Ministry of Health and Population, Faiyum, Egypt.

6 <sup>2</sup>Biomedical Informatics and Chemoinformatics Group, Centre of Excellence for medical  
7 research, National Research Centre, Cairo 12622, Egypt

8 <sup>3</sup>Informatics and Systems Department, Division of Engineering research, National Research  
9 centre, Cairo 12622, Egypt

10 <sup>4</sup> Department of Clinical Medicine, Faculty of Veterinary Science, University of Veterinary and  
11 Animal Sciences, 54600, Lahore Punjab Pakistan

12 <sup>5</sup> Microbiology and Public Health Department, Faculty of Pharmacy and Drug Technology,  
13 Heliopolis University, Cairo, Egypt

14 Corresponding author: Mahmoud M. Tolba

15 Email: mahmoud.tolba109@gmail.com

16

17 **Abstract:**

18 MicroRNAs are well known as short RNAs bases, 22 nucleotides, binding directly to  
19 3'untranslated region (3'UTR) of the messenger RNA to repress their functions. Recently,  
20 microRNAs have been widely used as a therapeutic approach for various types of Cancer.  
21 MicroRNA is categorized into tumor suppressor and oncomirs. Tumor suppressor microRNAs  
22 can repress the pathologically causative oncogenes of the hallmarks of Cancer. However, based  
23 on the fact that miRNA has no proper fidelity to bind specific mRNAs due to binding to off-  
24 targets, it results in a kind of inverse biological activity. Here, we have executed an *in-silico*  
25 integrative analysis of GEO/TCGA-LIHC of genes/microRNAs expression analysis in HCC,  
26 including (446 HCC vs. 146 normal specimens for miRNAs expression ) ad 488 specimens for  
27 genes expression. It virtually shows that microRNAs could have an ability to target both  
28 oncogenes and tumor suppressor genes that contribute to its dual activity role as a tumor  
29 suppressor and oncomirs via miRNA-lncRNA-TFs-PPI Crosstalk. Seven resultant microRNAs  
30 show a putative dual role in HCC. It enhances our concluded suggestion of using combination  
31 therapy of tumor suppressor genes activators with microRNAs.

32 **Keywords:** *in silico* tools; hepatocellular carcinoma; microRNAs

## 33 **1. Introduction**

34 Different types of Cancer are the lead diseases where the scientific community hunts for new  
35 approaches to cure them. One of these approaches is epigenetic therapy [1]. Epigenetics is a  
36 genetic field that strengthens our knowledge to comprehensively understand the factors that  
37 control the genes translations within the cells [2]. Long non-coding RNAs, small interfering  
38 RNA, and microRNAs are among these factors that control the translation of the genes [3-5].  
39 This activity controls various biological processes such as cellular differentiation, cell signaling,  
40 life span, and apoptosis. Cancer is a disease of deregulation of the normal state of biological  
41 processes called cancer hallmarks [6].

42 Here we are focusing on Hepatocellular carcinoma (HCC), which is promptly considered one  
43 of the most prevalent cancers worldwide [7-9]. With a rising rate, it is a prominent source of  
44 mortality. Patients with advanced fibrosis, predominantly cirrhosis, and hepatitis B are  
45 predisposed to developing HCC. Individuals with chronic hepatitis B and C infections are most  
46 commonly suffering [10]. Different therapeutic options, including liver resection,  
47 transplantation, systemic and local therapy, must be tailored to each patient [11]. One of the most  
48 promising therapies for HCC is microRNAs therapy. It is well demonstrated that tens of  
49 microRNAs have an ectopic expression in HCC. It directly correlates with the cancerous  
50 pathway by inducing the list of oncogenes list with the cancerous cells. The therapeutic approach  
51 by the restoration of microRNAs is inclined to suppress the oncogenes, decreasing Cancer [12].

### 52 **1.1 miRNAs**

53 MicroRNA dates back to the year 1993 as the first time the microRNAs term has been  
54 enlightening. The first microRNA ever was c.elegan let 7. It regulates the c.elegan timing  
55 development [13].

56 MicroRNAs are classes of non-coding RNAs that play an important role in gene expression  
57 regulation in Cancer [14, 15]. They are generally transcribed from DNA sequences into primary  
58 miRNA and processed into precursor miRNAs, and finally mature miRNAs [3]. The principal  
59 role of microRNAs is to control protein translation by binding to complementary sequences in

60 the 3' untranslated region (UTR) of target messenger RNAs (mRNAs) and thus deleteriously  
61 regulate mRNA translation. The microRNA–mRNA binding site is short (6–8 base pairs), and  
62 then each microRNA has the prospective to target multiple different mRNAs [16, 17].

## 63 **1.2 MicroRNA Biogenesis**

64 MicroRNAs biosynthesis has been well studied. The more well-known biogenesis pathway is  
65 the canonical pathway by which microRNAs are processed [18]. The canonical biogenesis  
66 pathway can be described as follows: pri-microRNAs are transcribed from their genes. This  
67 process into pri-miRNAs by microprocessor complex (RNA Binding protein DiGeorge  
68 Syndrome Critical Region 8 (DGCR8) and a ribonuclease III enzyme, Drosha. DGCR8  
69 recognizes an N6-methyladenylated GGAC and other motifs within the pri-miRNA, while  
70 Drosha cleaves the pri-miRNA duplex at the base of the characteristic hairpin structure of pri-  
71 miRNA. Accordingly, two nt 3' overhang on pre-miRNA is formed, one pre-miRNAs are  
72 formed. They will be exported by exportin 5 (XPO5)/RanGTP complex and then processed by  
73 the RNase III endonuclease Dicer. This processing includes terminal loop removal, and  
74 consequently, immature miRNAs duplex is formed.

75 miRNA strand directionality determines the name of the mature form of miRNA. The 5p strand  
76 arises from the 5-end from pre-miRNA hairpin, while the 3p strand originates from the 3-end .  
77 The strands mentioned above were derived from the mature miRNA duplex, which can be loaded  
78 into the Argonaute (AGO) family of proteins (AGO1-4 in humans) in an ATP-dependent  
79 manner. For any given miRNA, this is a great difference between the proportional of AGO-  
80 loaded 5p or 3p, which depends on the cell type or cellular environment. They may occur as one  
81 more predominant than the other. The 5p or 3p strand selection is based on the thermodynamic  
82 stability at the 5' ends of the miRNA duplex or a 5' U at nucleotide position1. Commonly, the  
83 lower 5-strand or 5-uracil strand is likely loaded into AGO and estimated the guide strand. The  
84 unloaded strand (passenger strand) is the unwanted strand from the guide strand through various  
85 mechanisms depending on the complementarity degree. The microRNA passenger strand with no  
86 mismatches is AGO2 sliced and cellular machinery degraded. Therefore, strong bias can be  
87 produced. On the other hand, central mismatches miRNA duplexes or non-AGO2 loaded miRNA  
88 are inertly unwound and degraded [19-21].

### 89 **1.3 Bioinformatics role in cancer therapy:**

90 Through Bioinformatics analysis of microarray and high through genomic data, hundreds of  
91 ectopic expression of genes and microRNAs within various cancer types have been discovered  
92 via free online Bioinformatics tools that play an effective role in predicting new targets for  
93 microRNA and its genetic enrichment [22]. There are many free online tools [23] that show the  
94 binding mode of tens of predicted genes for each microRNA, such as RNA22 [24], DIANA [25],  
95 and miRanda [26]. It helps most in discovering new targets for the miRNAs for wet-lab  
96 experiments. Here, multiple genes/microRNAs expression datasets have been used to uncover  
97 the interaction of miRNAs with mRNAs, long non-coding RNA (LncRNA) [27], transcription  
98 factors (TFs) [28], and protein-protein interaction (PPI) [29]. For miRNA-mRNA-LncRNA-TFs-  
99 PPI crosstalk analysis, the followed work pipeline has helped most in putatively visualize all the  
100 factors that may have a control on miRNAs path to be biologically active as oncomiR or tumor  
101 suppressor as shown in the following flowchart (Figure 1).

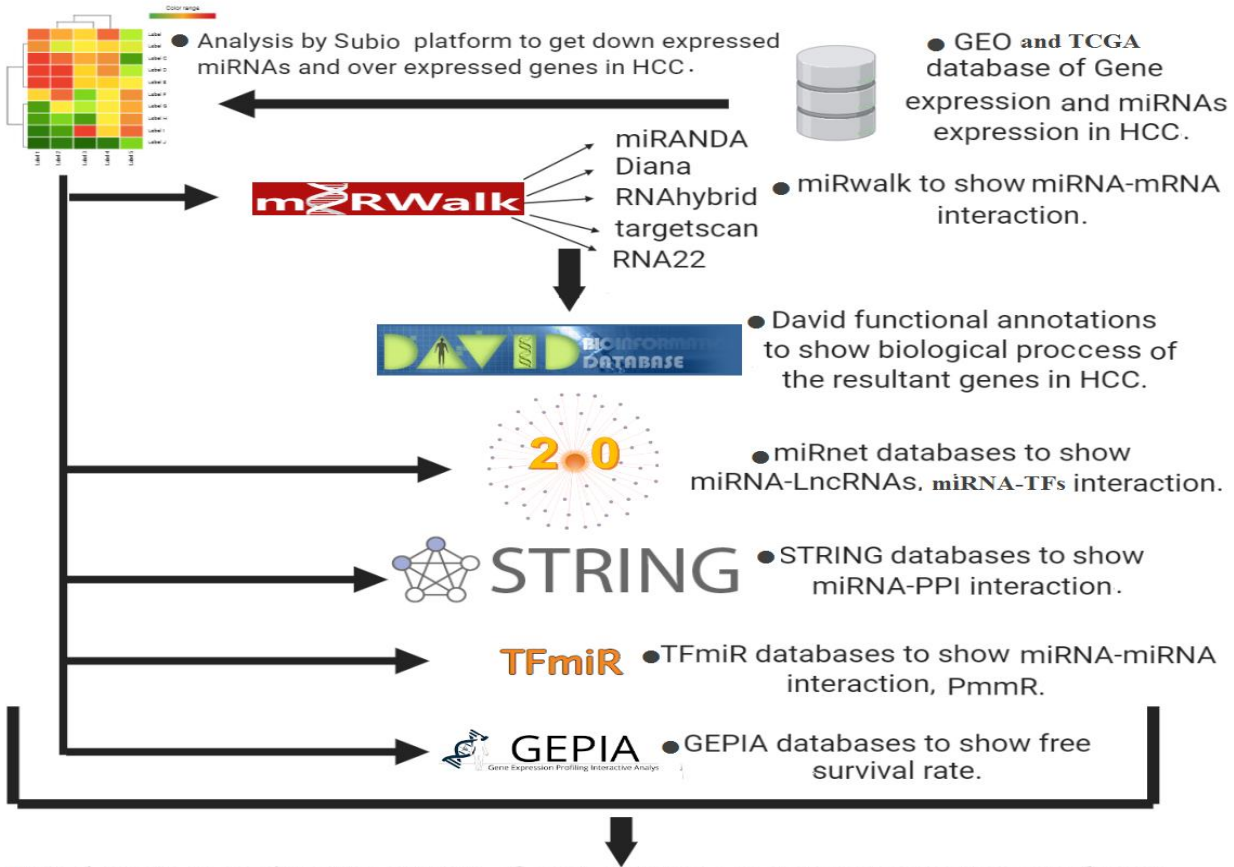

102  
103 Figure 1: Flowchart of the implemented workflow illustrates the methods that have been  
104 followed.

105 A pool of the most differentially expressed miRs in HCC has been evolved and showed for their  
106 involved actions in tumor development or progression. Interestingly in this context, our current  
107 study will aim to perform a bioinformatics protocol on a huge list of the significantly down  
108 expressed microRNAs within the HCC cells to unveil their activity role. It was found that one  
109 microRNA has a potential role in working as a tumor suppressor and tumor activator for the  
110 hallmarks of liver cancer.

## 111 2. Methodology

### 112 2.1 Collecting data of the significantly down-expressed microRNAs in HCC:

113 Using NCBI Pubmed <https://www.ncbi.nlm.nih.gov/pubmed/>, we have searched for all  
114 published scientific articles and reviews working on microRNAs as a therapeutic approach for

115 liver cancer. We used "MicroRNA+Hepatocellular Carcinoma" as a query for our search. To  
116 deepen our data, we utilized the PhenomiR [30] database to get all the microRNAs related to  
117 Hepatocellular carcinoma.

118 To enrich our work, we have surveyed different registry of NCBI Gene Expression Omnibus  
119 microarray databases for the miRs, and interestingly we have chosen five databases [31, 32] and  
120 one TCGA LIHV –RNA seq databases with broad samples of 446 HCC vs. 146 adjacent normal  
121 specimens which cover cirrhosis and G2/M phase of HCC.

122 These six integrated datasets are "Miltenyi Biotec miRXplore miRNA Microarray, GSE28854",  
123 Capital Bio Mammalian miRNA Array Services V1 [1].0, GSE10694", "Affymetrix Multispecies  
124 miRNA-2 Array, GSE74618"Affymetrix Multispecies miRNA-4 Array, GSE115016" "Agilent-  
125 031181 Unrestricted\_Human\_miRNA\_V16.0\_Microarray, GSE110217" and "TCGA-LIHC,  
126 RNA seq". These integrated datasets have been downloaded and analyzed by the Subio Platform  
127 PC program <http://www.subio.jp/products/platform> to be filtered to get the overlap of common  
128 down-expressed microRNAs in HCC specimens. The resultant list of the down-expressed  
129 miRNAs, from datasets analysis, has been cross–confirmed by the previously mentioned manual  
130 search within NCBI Pubmed and PhenomiR [33] .

## 131 **2.2 Collecting data of over-expressed genes in HCC:**

132 We have downloaded three integrated and recent datasets like miR datasets collection by  
133 utilizing NCBI GEO microarray databases. They included the following " Affymetrix Human  
134 Genome U133A 2.0 Array" GSE14520", "Affymetrix HT Human Genome U133A Array,  
135 GSE14520" and TCGA- LIHC, and they have been conducted by subio platform program to get  
136 the overexpressed genes in HCC.

## 137 **2.3 miRNAs-targets prediction**

138 First, an online miRBase database [34, 35] was used to get access to microRNAs. After that,  
139 we have utilized miRWalk [36] to get the predicted and validated target genes of each  
140 microRNA. Five different bioinformatics tools have been chosen to get the highest accuracy and  
141 specificity for our predicted genes data. These five tools were miRANDA [26], DIANA [25],  
142 RNAhybrid [37], targetscan [38] and RNA22 [24]. The validated miRNA targets by miRWalk

143 have been further enriched and confirmed via online experimental miRs-targets interaction  
144 databases such as DIANA-TarBase v7.0 [39] and mirtarbase databases [40].

## 145 **2.4 Enrichment and gene ontology**

146 David functional annotation [41] was run to get biological processes and genes ontology of  
147 each list of miRNA targets, which resulted from miRwalk. P-value < 0.05 was set as cut off of  
148 the chosen biological process. The common resultant genes from datasets analysis by subio  
149 platform and shown by miRwalk are enriched by David functional annotation.

150 The final step was data-filtration to highlight the biological process that is only related to  
151 hepatocellular carcinoma hallmarks to show the impact of microRNAs as either tumor  
152 suppressor or oncomiR. The previously filtrated genes have been used to draw a microRNAs-  
153 targets network by Cytoscape [42] to show the transcriptomic level's miRs interactions.

## 154 **2.5 miRNA-lncRNA interaction**

155 miRNet online tool [43] was used to determine the regulatory interaction of microRNA-  
156 LncRNA and microRNA-TFs interaction.

## 157 **2.6 miRNA-miRNA interaction**

158 TFmiR online tool [44] was used to get the regulatory roles of microRNA-microRNA  
159 interaction. TFmiR is based on disease-specific microRNAs of putative miRNA-miRNA  
160 regulations, PmmR database [45].

## 161 **2.7 miRNA- "Protein-Protein" interaction**

162 Differential gene expression (UP/down) has been used for PPI constructing network by  
163 STRING v10 tool [46]. The Biological processes of the resultant network were filtrated into the  
164 ones related to HCC. The genes incorporated in the output, Biological processes, were  
165 reanalyzed via miRWalk to get down expressed miRNAs in HCC, correlated to these BPs.

## 166 **2.8 Free survival analysis**

167 Here, the aim is to visualize the potential impact of microRNA on the HCC survival  
168 progression using GEPIA [47]. The selected genes on the central role of PPI by owning the  
169 highest number of edges.

### 170 3. Results

#### 171 3.1. MicroRNAs ectopic expression in HCC.

172 A list of 24 significantly down expressed microRNAs in HCC has been identified by Subio  
173 platform PC for the overall six datasets, including GEO and TCGA-LIHC, RNA seq databases  
174 (Figure 2). These down expressed microRNAs have been selected because they are common  
175 among at least two datasets out of the six datasets. They have been further confirmed via the  
176 PhenoMiR database (HCC).

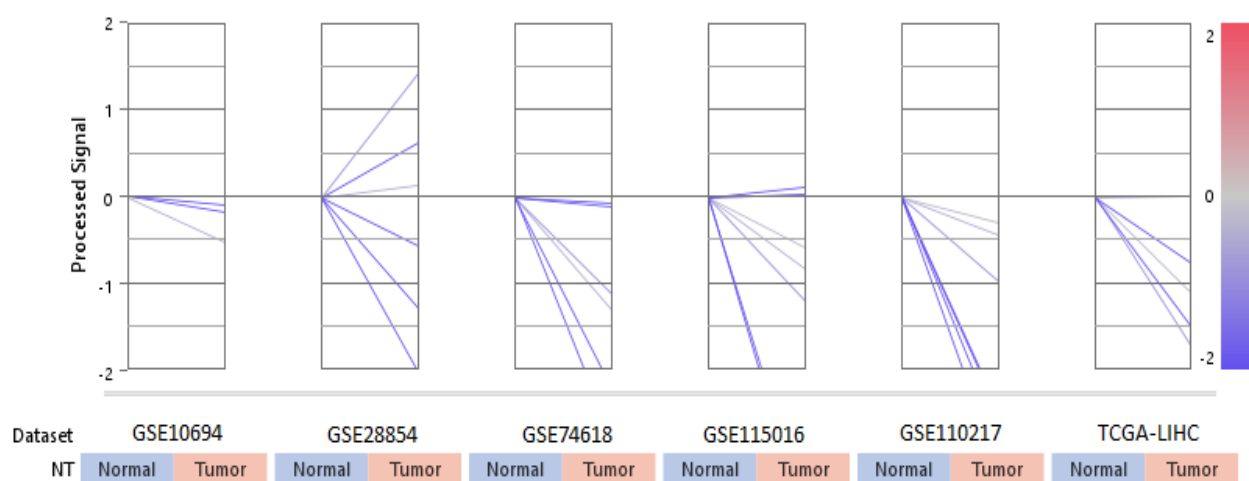

177  
178 Figure2: the down-expressed microRNAs in HCC, 24 microRNAs.

#### 179 3.2. Expression of genes targeted by the microRNAs

180 As one of the main criteria for microRNA is that it is used as a gene therapy, the targeted  
181 genes should be overexpressed within the HCC cell line. The overexpression of these genes  
182 alters its function to be cancerous genes via inducing cancerous biological processes. Here, GEO  
183 datasets and TCGA-LIHC database have been analyzed by subio platform to show the common  
184 up-expressed genes in all datasets, combined to HCC target genes which have previously shown  
185 by Disease-annotation of miRwalk for Hepatocellular carcinoma. It resulted in 180



186 overexpressed shared within," Affymetrix Human Genome U133A 2.0 Array" ' GSE14520",  
187 "Affymetrix HT Human Genome U133A Array, GSE14520" and TCGA- LIHC (Figure 3 a & b).  
188 Any gene, shown as down-expressed in HCC, has been excluded.

189

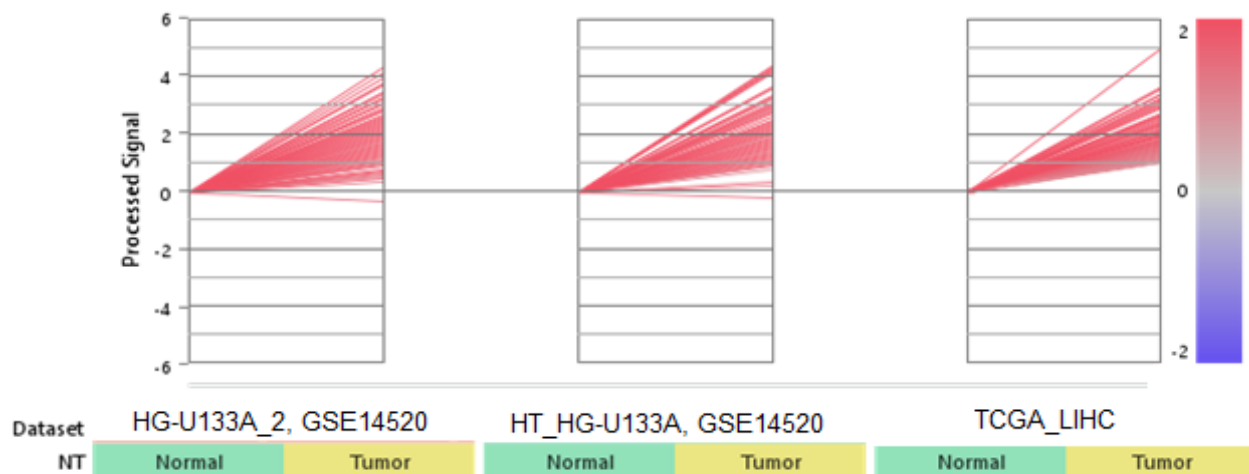

190

191 Figure 3: a) the differentially up-expressed genes in HCC

192

193

194

195

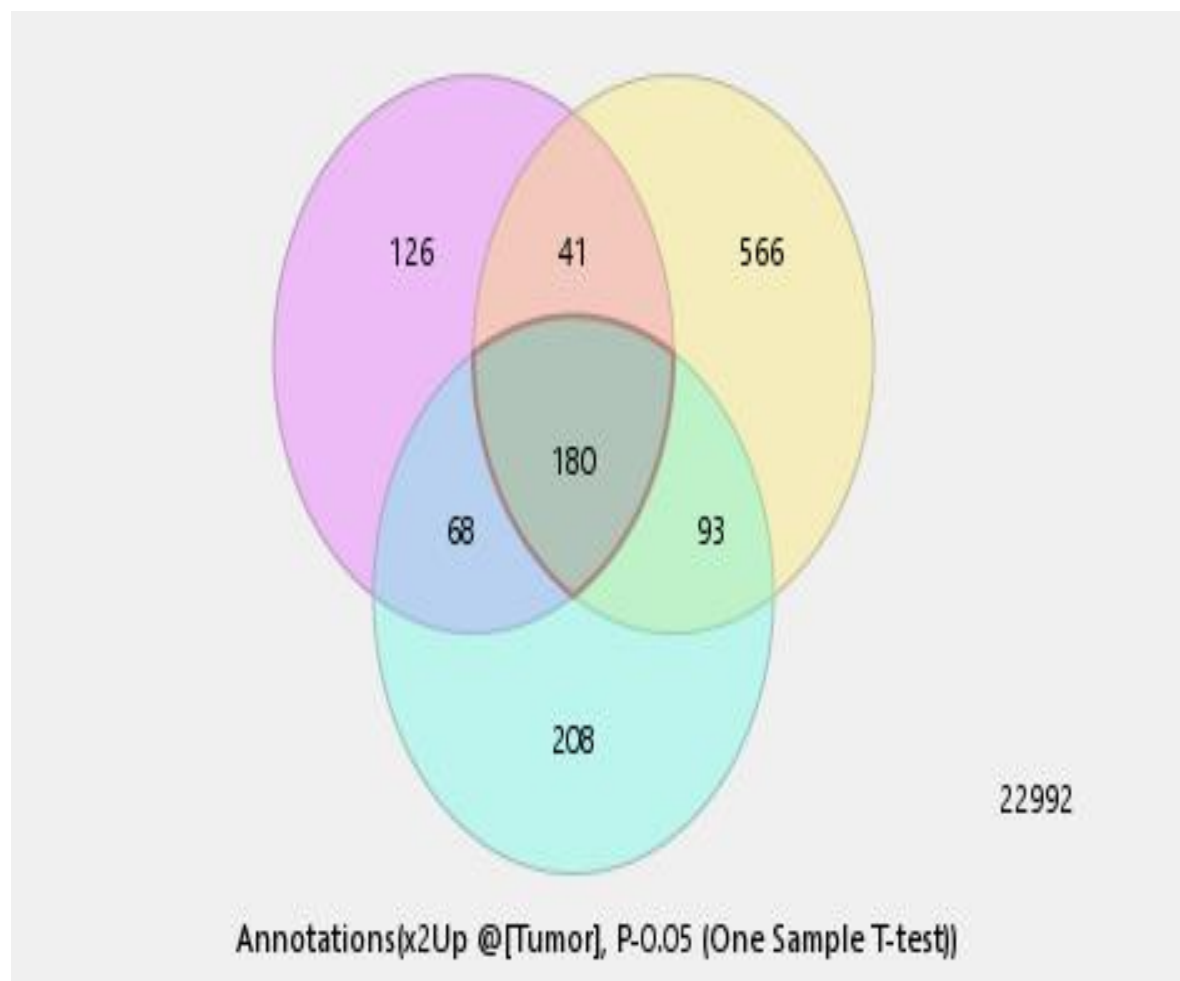

196

197 Figure 3: b) 180 genes are found to be common over-expression genes in HCC.

### 198 3.3. microRNAs-genes interactions.

199 Each microRNA of our 24 ones has hundreds of target genes resulted from an integrative  
200 analysis of HCC gene expression datasets by subplatform (Figure 2), combined with resultant  
201 genes from miRwalk related to HCC hallmarks, Disease-annotation of miRwalk for  
202 Hepatocellular carcinoma has been implemented for search, as combinatorial targets  
203 (supplementary 1). This analysis has evolved a list of HCC genes, further directed to determining  
204 the expected Cytoscape networking with our 24 mirs. Interestingly, the regulatory network of 24  
205 mirs with its target genes has been overviewed in (figure 4).

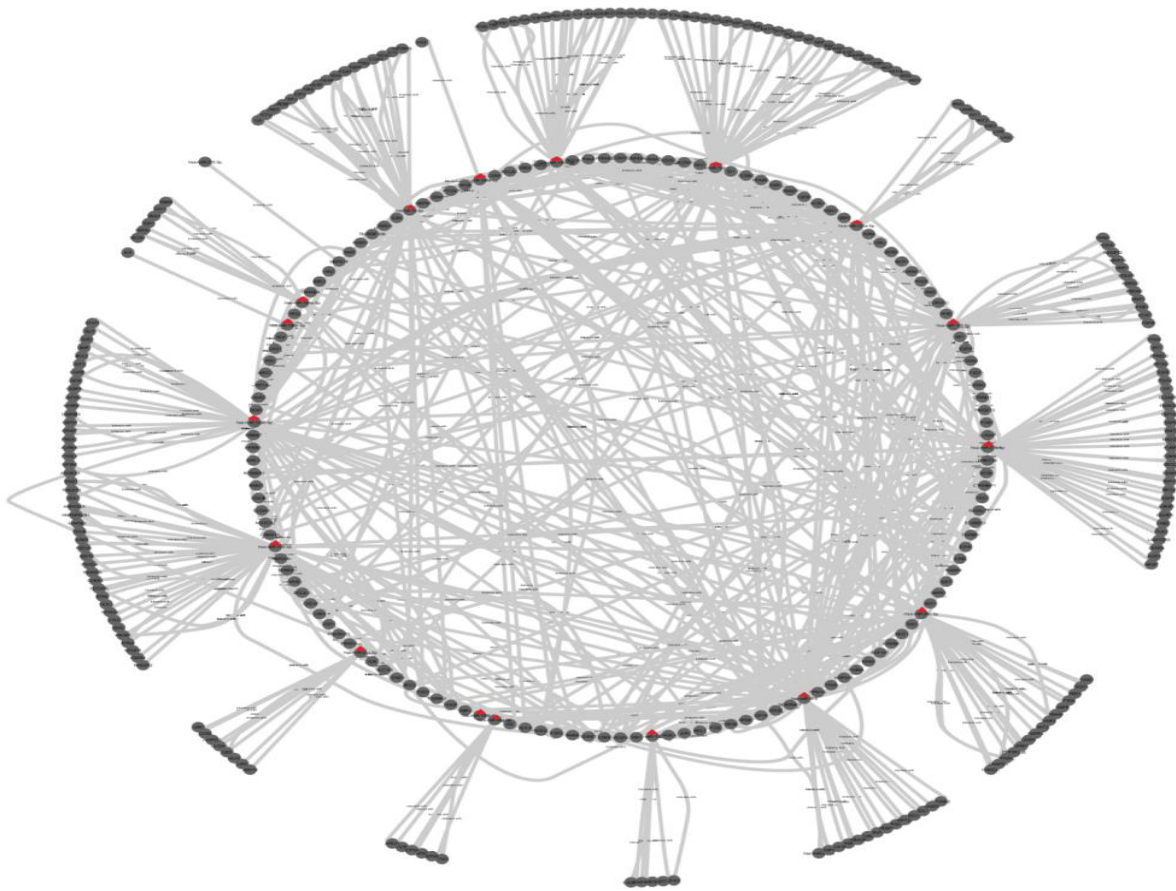

206

207 Figure4: A regulatory network of microRNAs, Red triangle, with their targets, drawn by  
208 Cytoscape.

### 209 **3.4. Biological Process of microRNAs.**

210 It was unveiled that microRNA has a biological process related to tumor suppressor and tumor  
211 activator (Figure 5).

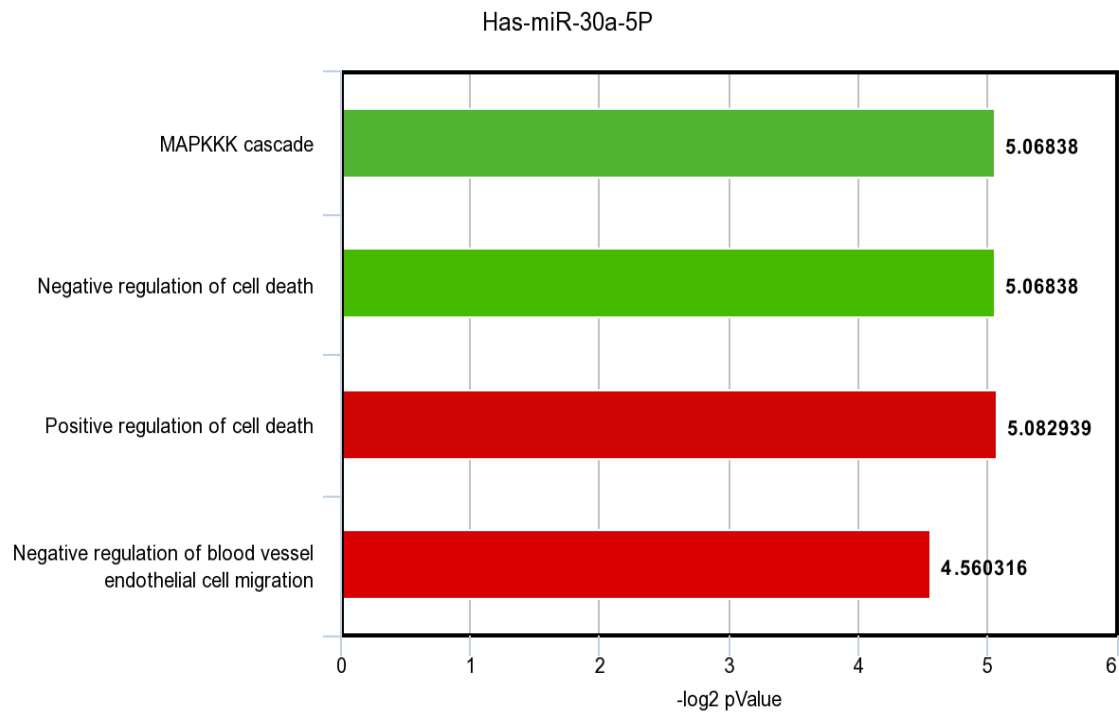

212

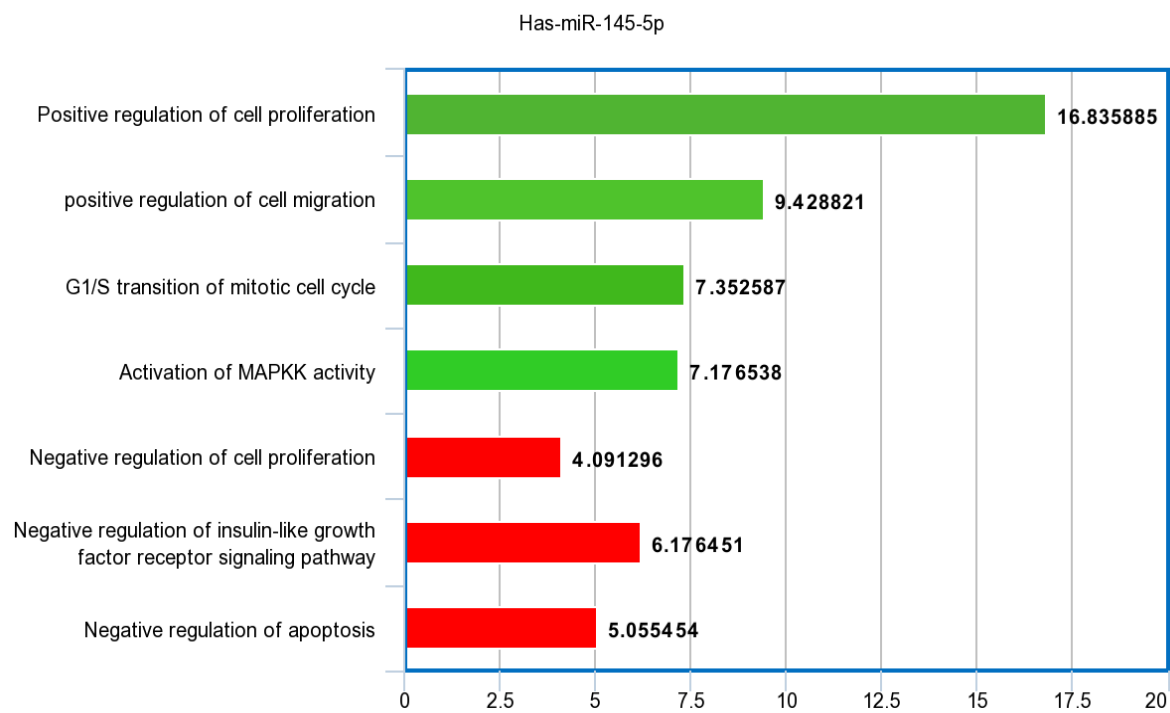

213

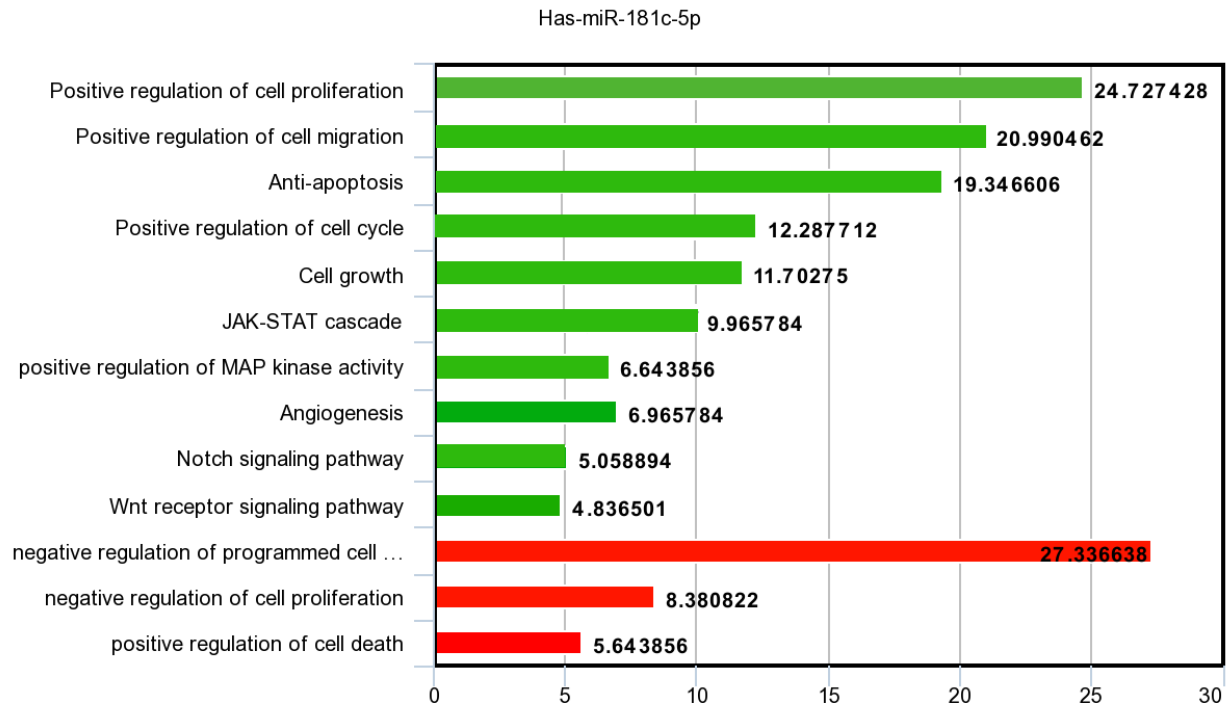

214  
215

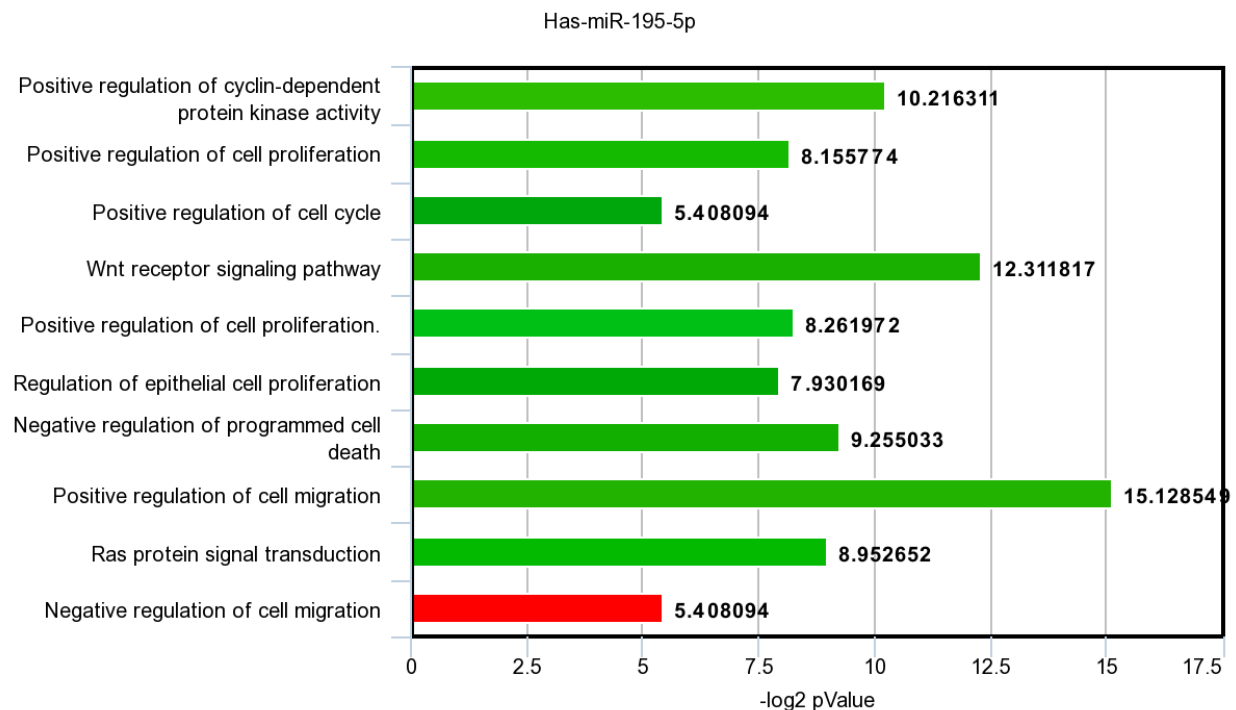

216  
217

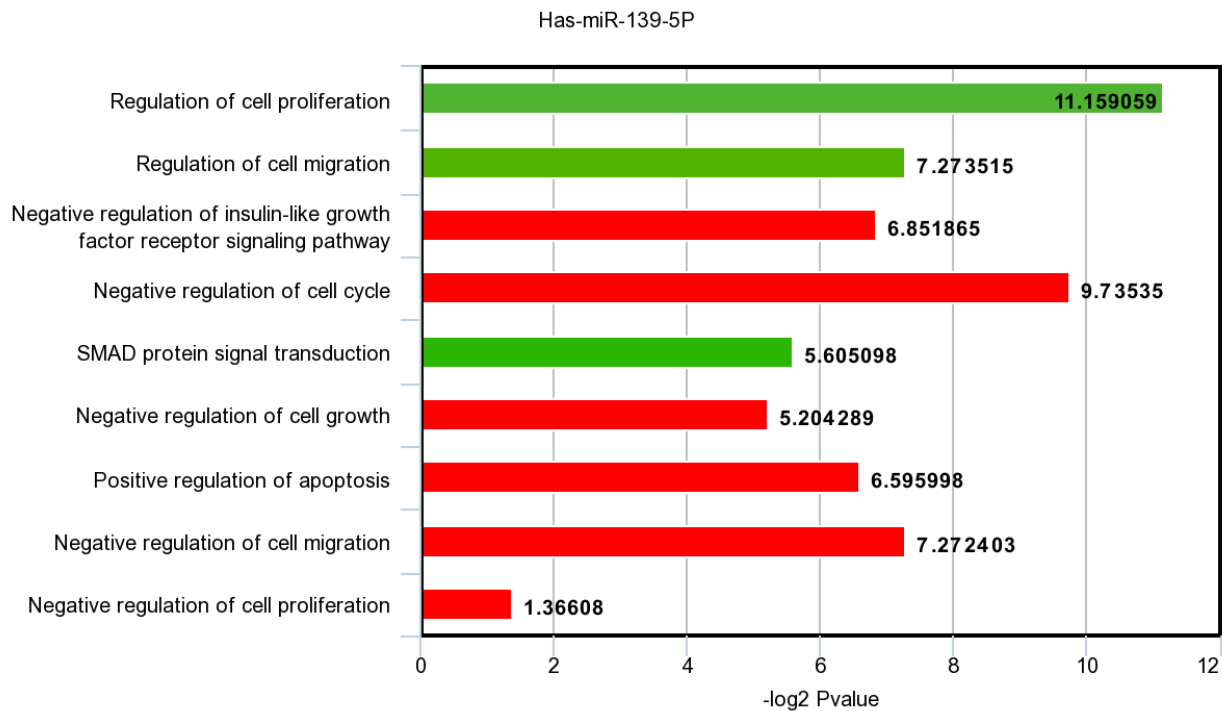

218  
219

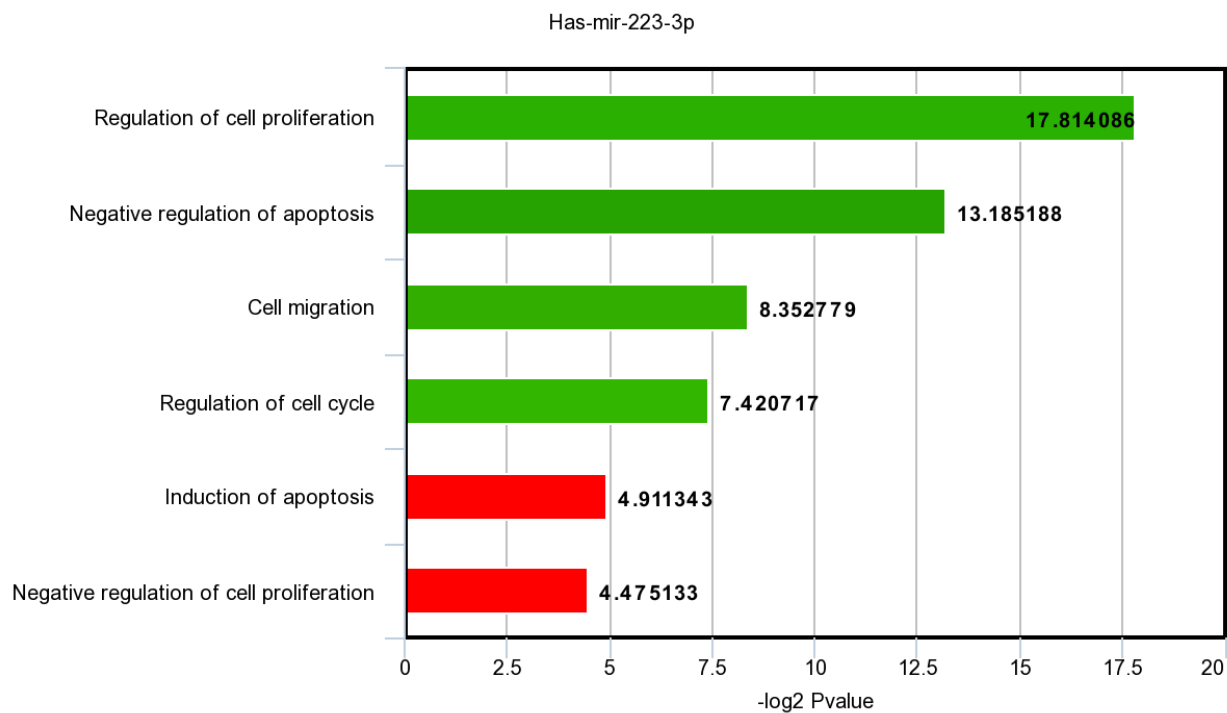

220  
221

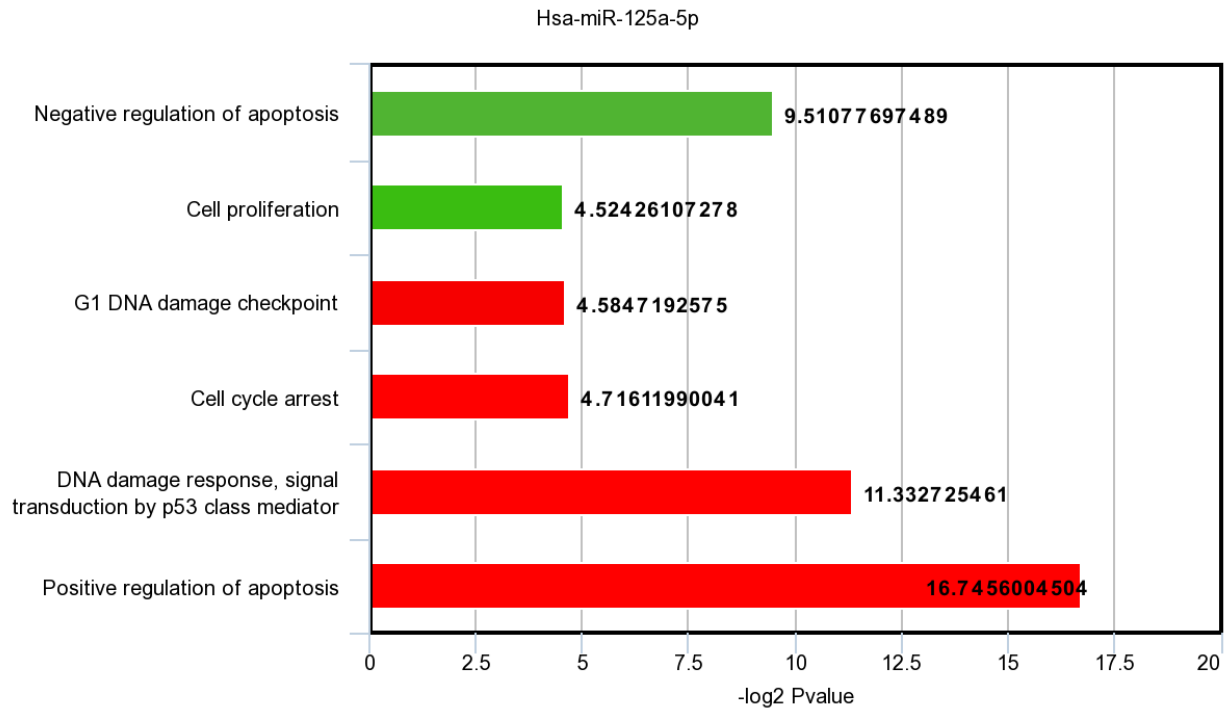

222  
223 Figure5: BP of target genes of down expressed miRs in HCC. Green bars show the tumor  
224 suppressor activity of miRs. Red bars show their oncogenic activity.

225 Here, figure 4 shows a set of down-expressed microRNAs in HCC with their biological  
226 process of the genes targeted by microRNA; only the BP of  $P$ -value  $< 0.05$  has been selected.  
227 The dual role of microRNA in HCC is evaluated by the impact of microRNA on BP of HCC  
228 hallmarks either as an inducer or suppressor. The resultant is that each microRNA shows a dual  
229 role, either tumor suppressor (green bars) or onco-miR (red bars).

### 230 3.5. miRNA-TFs regulatory role

231 Four microRNAs have been found with abundant TFs targets (Figure 6).

232

233

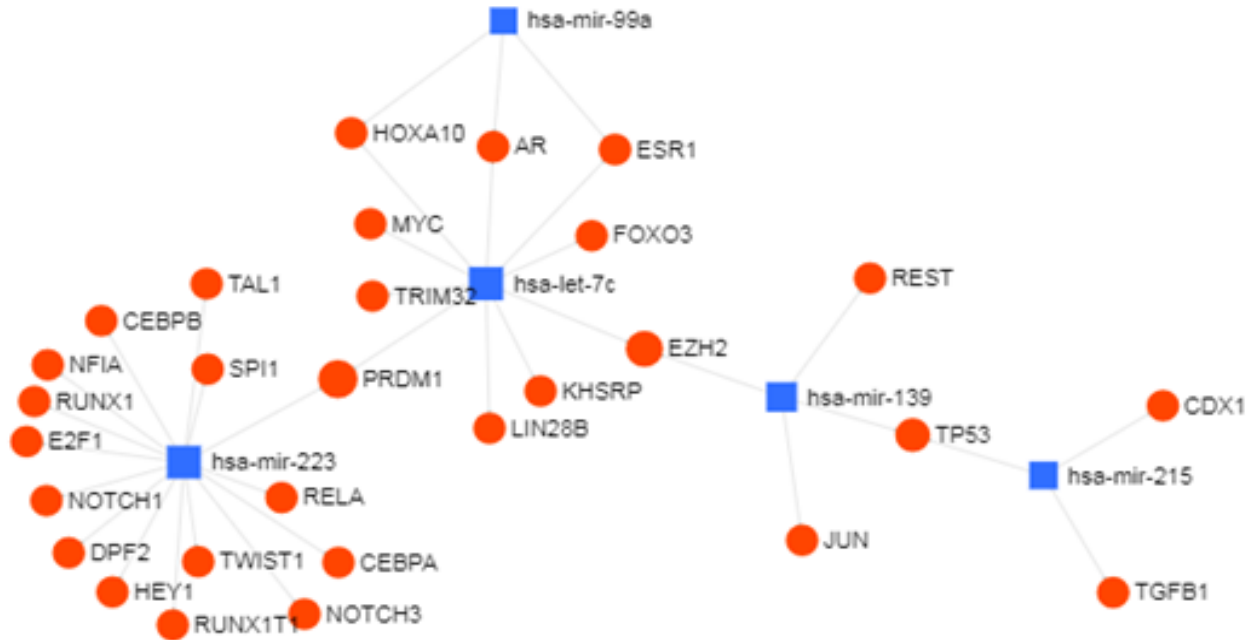

234  
235 The figure 6: miRNA-TFs regulatory role.

236

237 Four microRNAs show tumor suppressor activity upon targeting TFs as transcriptional  
238 regulatory factors as ant-apoptosis and proliferation regulation. Hence, repressing these TFs  
239 results in tumor suppression, as shown in (table 1).

240 **Table 1:** shows Regulatory role of miRNA-TF interaction in HCC

| MiRNA       | TFs                                                                                           | Regulatory role of miRNA-TFs interaction in HCC |
|-------------|-----------------------------------------------------------------------------------------------|-------------------------------------------------|
| hsa-let-7c  | AR,ESR1,EZH2,FOXO3,HOXA10,KHSR<br>P,LIN28B,MYC,PRDM1,TRIM32                                   | Tumor suppressor                                |
| hsa-mir-139 | EZH2,JUN,REST,TP53                                                                            | Tumor suppressor                                |
| hsa-mir-215 | CDX1,TGFB1,TP53                                                                               | Tumor suppressor                                |
| hsa-mir-223 | CEBPB,DPF2,E2F1,HEY1,NFIA,NOTCH<br>1,NOTCH3<br>,PRDM1,RELA,RUNX1,RUNX1T1,SPI1,<br>TAL1,TWIST1 | Tumor suppressor                                |

241



242 **3.6. miRNA-LncRNA interaction**

243 Eight microRNAs have shown potential interaction with lncRNAs (Figure 7) ( Table 2).

244 LncRNA acts as a CeRNA sponge for microRNA. Subsequently, it results in the excessive

245 inhibitory activity of miRNA-mRNA interaction by excessive down-expressing of miRNAs.

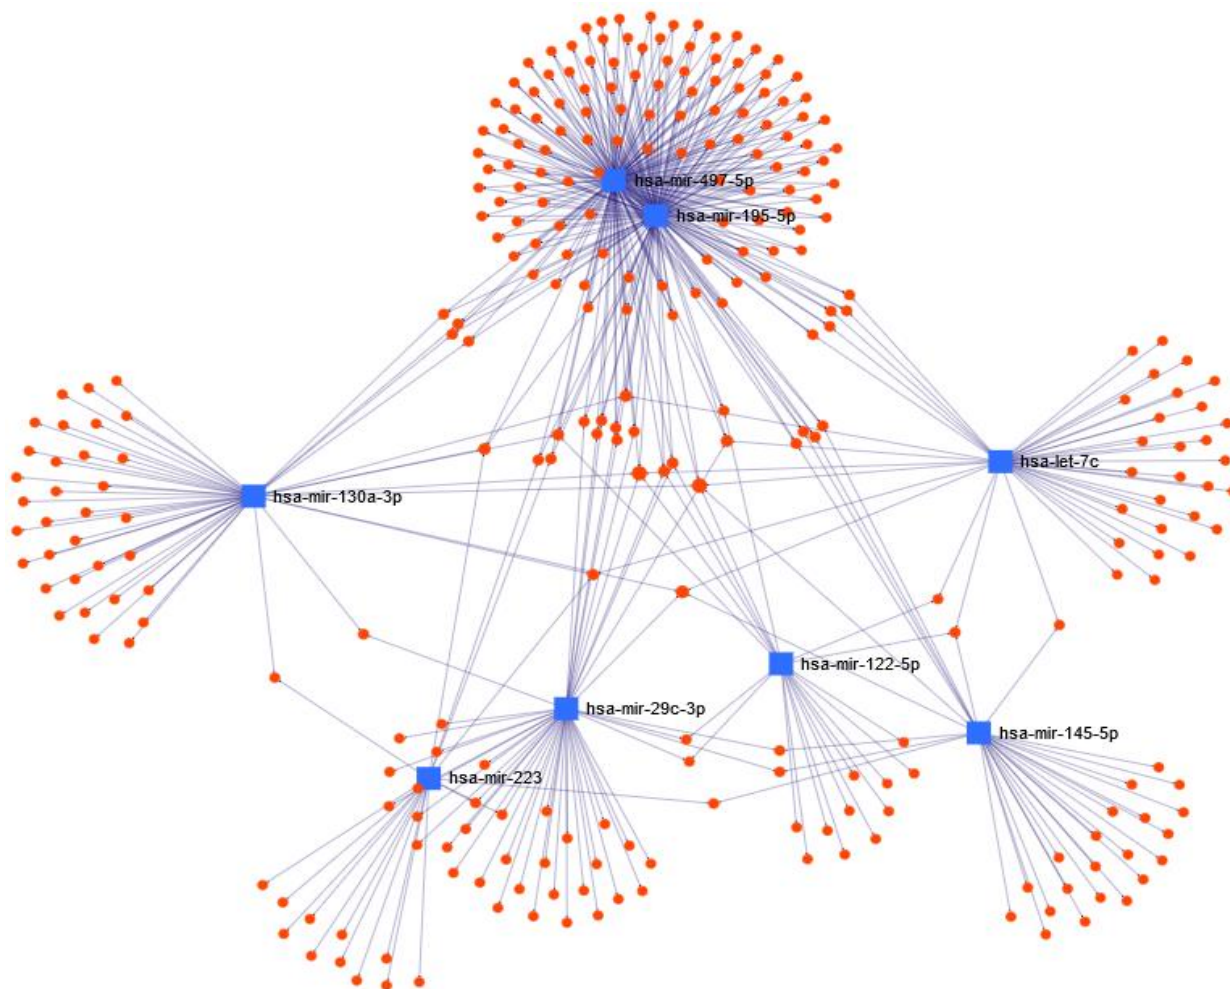

246  
247 Figure 7: miRNA-lncRNA regulatory role.

248 **Table 2:** shows Regulatory role of Therapeutic effect of microRNA-lncRNA on HCC

| microRNA   | LncRNA                                                                                                                                       | Therapeutic effect of microRNA-lncRNA on HCC. |
|------------|----------------------------------------------------------------------------------------------------------------------------------------------|-----------------------------------------------|
| hsa-let-7c | AC074117.10,AC105760.2,CASP8AP2,CDKN2B-AS1,CTA-204B4.6,CTD-2270L9.5,CTD-3138B18.5,HOXA11-AS,KCNQ1OT1,LINC00263,LINC00665,MIR4720,NEAT1,NUTM2 | Onco-miR                                      |

A-AS1,PTCHD3P1,RP11-1103G16.1,RP11-197N18.2,RP11-214O1.2,RP11-264B17.3,RP11-277P12.20,RP11-27I1.2,RP11-282O18.6,RP11-452L6.5,RP11-457M11.2,RP11-473I1.10,RP11-492E3.1,RP11-498P14.3,RP11-727A23.5,RP11-819C21.1,RP11-834C11.4,RP11-923I11.1,RP11-996F15.2,RP13,507I23.1,SCARNA10,TTY15,UBXN8,XIST,XXba  
c-BPG300A18.13,ZNF518A

|                 |                                                                                                                                                                                                                                                                                                                                                                                                                                                                                                                                                                                                                                                                                                                      |          |
|-----------------|----------------------------------------------------------------------------------------------------------------------------------------------------------------------------------------------------------------------------------------------------------------------------------------------------------------------------------------------------------------------------------------------------------------------------------------------------------------------------------------------------------------------------------------------------------------------------------------------------------------------------------------------------------------------------------------------------------------------|----------|
| hsa-mir-122-5p  | AC005154.5, AC084ASB16-AS1,CDKN2B-AS1,CTA-204B4.6,CTC-503J8.6,CTD-2517M14.5, MAL2,MIR3179-1,MIR3179-2,PCBP1-AS1,RP11-290F20.1,RP11-518L10.2,RP11-571M6.18,RP6-24A23.7,SNHG7,VP S11                                                                                                                                                                                                                                                                                                                                                                                                                                                                                                                                   | Onco-miR |
| hsa-mir-130a-3p | AC007038.7,AC007040.7,AC084018.1,AC084219.4,AC135048.13,AP001065.15,BOLA3-AS1,CCAT1,CTA-204B4.6,CTB-92J24.2,CTC-281B15.1,CTD-2369P2.2,CTD-3092A11.2,FGD5-AS1,H19,HOTAIR,HOXA11-AS,HOXD-AS1,KCNQ1OT1,LINC00116,LINC00339,LINC00667,LINC00839,MAP3K14,MIR17HG,NUTM2A-AS1,PRKCQ-AS1,RP11-197P3.5,RP11-290D2.4,RP11-344B2.2,RP11-355O1.11,RP11-361F15.2,RP11-363E7.4,RP11-429J17.6,RP11-588K22.2,RP11-656D10.3,RP11-73M18.8,RP1-178F10.3,RP11-84C13.1,RP13-638C3.2,RP4-639F20.3,SEC22B,SLC26A4-AS1,TMEM161B-AS1,XIST,ZNRD1-AS1                                                                                                                                                                                           | Onco-miR |
| hsa-mir-145-5p  | AC016683.6,AC069513.3,AC142401.2,AL589743.1,C17orf76-AS1,CTA-204B4.6,CTD-2116N17.1,CTD-2516F10.2,GS1-251I9.4,HNRNPU-AS1,hsa-mir-132,IQCH-AS1,JPX,KCNQ1OT1,LINC00707,LINC00852,MAL2,MALAT1,MAPKAPK5-AS1,RP11-115D19.1,RP11-156E6.1,RP11-214C8.5,RP11-344E13.3,RP11-478C19.2,RP11-705C15.3,RP11-74E22.3,RP11-793H13.8,RP1-37E16.12,SCARNA10,SNHG1,TUG1,UHRF1                                                                                                                                                                                                                                                                                                                                                           | Onco-miR |
| hsa-mir-195-5p  | AC003092.1,AC003104.1,AC004383.4,AC005154.5,AC005154.6,AC005537.2,AC005562.1,AC011893.3,AC016629.8,AC074093.1,AC084219.4,AC090587.2,AC091878.1,AC108142.1,AC113189.5,AP000721.4,AP001065.2,C14orf169,C1RL-AS1,CERS6-AS1,CTA-204B4.6,CTB-50E14.6,CTB-89H12.4,CTBP1-AS1,CTC-228N24.3,CTC-246B18.8,CTC-429P9.3,CTC-444N24.11,CTD-2201E18.3,CTD-2339L15.3,CTD-2516F10.2,CTD-2574D22.4,CWC15,DCP1A,DLG1-AS1,DLX6-AS1,EPB41L4A-AS1,ERI3-IT1,ERVK13-1,FENDRR,FGD5-AS1,GS1-124K5.11,GS1-358P8.4,HCG17,HCG18,IQCH-AS1,KIF9-AS1,LA16c306E5.2,LINC00094,LINC00176,LINC00339,LINC00473,LINC00511,LINC00649,LINC00662,LINC00707,LL22NC03-N27C7.1,MCM3AP-AS1,MEG8,MIR497HG,NUTM2A-AS1,PDXDC2P,PVT1,RASAL2-AS1,RP11-1103G16.1,RP11- | Onco-miR |

---

|                |                                                                                                                                                                                                                                                                                                                                                                                                                                                                                                                                                                                                                                                                                                                                                                                                                                                                                                                                                                                                                                                                                                                                                                                                                                                                     |          |
|----------------|---------------------------------------------------------------------------------------------------------------------------------------------------------------------------------------------------------------------------------------------------------------------------------------------------------------------------------------------------------------------------------------------------------------------------------------------------------------------------------------------------------------------------------------------------------------------------------------------------------------------------------------------------------------------------------------------------------------------------------------------------------------------------------------------------------------------------------------------------------------------------------------------------------------------------------------------------------------------------------------------------------------------------------------------------------------------------------------------------------------------------------------------------------------------------------------------------------------------------------------------------------------------|----------|
| hsa-mir-223    | 125K10.4,RP11-155D18.12,RP11-159D12.9,RP11-169K16.9,RP11-16E12.2,RP11-18A3.4,RP11-204M4.2,RP11-216F19.2,RP11-218M22.1,RP11-21N3.1,RP11-244H3.1,RP11-244O19.1,RP11-277L2.2,RP11-27I1.2,RP11-282K24.3,RP11-2C24.4,RP11-329L6.1,RP11-361F15.2,RP11-379K17.11,RP11-383C5.4,RP11-383J24.5,RP11-384K6.6,RP11-38J22.6,RP11-390P2.4,RP11-403I13.4,RP11-43D2.6,RP11-453E17.1,RP11-461L13.3,RP11-464F9.1,RP11-467L20.9,RP11-474P12.5,RP11-477D19.2,RP11-506M13.3,RP11-540O11.1,RP11-543D5.2,RP11-549J18.1,RP11-54O7.1,RP11-588K22.2,RP11-60I3.5,RP11-64K12.2,RP11-66B24.4,RP11-677M14.3,RP11-690G19.3,RP11-697M17.1,RP11-773D16.1,RP11-869B15.1,RP11-91G21.2,RP11-923I11.1,RP11-96D1.10,RP11-973H7.2,RP11-983P16.4,RP1-283E3.8,RP1-310O13.12,RP13-507I23.1,RP3-341D10.4,RP3-486L4.3,RP4-614O4.11,RP4-773N10.5,RP5-1028K7.2,RP5-1148A21.3,RP5-1172N10.3,RP5-1180C10.2,RP5-955M13.3,RP6-206I17.2,RP6-24A23.7,SCGB1B2P,SEMA3B,SENP3-EIF4A1,SLC37A4,SNHG1,SNHG12,SNHG16,SPPL2B,TRAF3IP2-AS1,TTN-AS1,XIST,XXbac-B461K10.4,XXbac-BPG32J3.20,ZNF518A,ZNRD1-AS1,AC006262.5<br>AC006262.5,AP001172.2,C17orf76-AS1,CTB-89H12.4,CTC-444N24.11,CTC-479C5.10,FGD5-AS1,GAS5,HOXA11-AS,INTS6-AS1,LINC00846,MAGI2-AS3,MIR155HG,MIR17HG,OIP5-AS1,PITPNA-AS1,POLDIP2,RP11-284N8.3,RP11-403I13.8 | Onco-miR |
| hsa-mir-29c-3p | AC005154.5,AC005154.6,AC007036.5,AC012146.7,AP000304.2,CTD-2116N17.1,CTD-2339L15.1,CTD-2517M14.5,EMG1,GAS5,GS1-124K5.11,H19,HCP5,HOXA-AS3,HOXA-AS4,KCNQ1OT1,LIFR-AS1,LINC00338,LINC00511,MIAT,MLLT4-AS1,OIP5-AS1,RP11-145M9.4,RP11-216F19.2,RP11-220I1.1,RP11-227G15.3,RP11-280F2.2,RP11-290F20.1,RP11-303E16.8,RP11-311C24.1,RP11-347I19.3,RP11-373L24.1,RP11-429J17.2,RP11-467L20.9,RP11-480D4.3,RP11-615I2.7,RP11-618G20.1,RP11-690G19.3,RP4-665N4.8,RP5-837J1.2,SETD5-AS1,SIK3-IT1,SPPL2B,TUG1,U47924.19,XIST,ZNF518A,ZNF761                                                                                                                                                                                                                                                                                                                                                                                                                                                                                                                                                                                                                                                                                                                                    | Onco-miR |
| hsa-mir-497-5p | AC003092.1,AC003104.1,AC004383.4,AC005154.5,AC005154.6,AC005537.2,AC005562.1,AC011893.3,AC016629.8,AC074093.1,AC084219.4,AC090587.2,AC091878.1,AC108142.1,AC113189.5,AP000721.4,AP001065.2,C14orf169,C1RL-AS1,CERS6-AS1,CTA-204B4.6,CTB-50E14.6,CTB-89H12.4,CTBP1-AS1,CTC-228N24.3,CTC-246B18.8,CTC-429P9.3,CTC-444N24.11,CTD-2201E18.3,CTD-2339L15.3,CTD-2516F10.2,CTD-2574D22.4,CWC15,DCP1A,DLG1-AS1,DLX6-AS1,EPB41L4A-AS1,ERI3-IT1,ERVK13-1,FENDRR,FGD5-AS1,GS1-124K5.11,GS1-358P8.4,HCG17,HCG18,IQCH-AS1,KIF9-AS1,LA16c306E5.2,LINC00094,LINC00176,LINC00339,LINC00473,LINC00511,LINC00649,LINC00662,LINC00707,LL22NC03-                                                                                                                                                                                                                                                                                                                                                                                                                                                                                                                                                                                                                                        | Onco-miR |

---

N27C7.1,MCM3AP-AS1,MEG8,MIR497HG,NUTM2A-AS1,PDXDC2P,PVT1,RASAL2-AS1,RP11-1103G16.1,RP11-125K10.4,RP11-155D18.12,RP11-159D12.9,RP11-169K16.9,RP11-16E12.2,RP11-18A3.4,RP11-204M4.2,RP11-216F19.2,RP11-218M22.1,RP11-21N3.1,RP11-244H3.1,RP11-244O19.1,RP11-277L2.2,RP11-27I1.2,RP11-282K24.3,RP11-2C24.4,RP11-329L6.1,RP11-361F15.2,RP11-379K17.11,RP11-383C5.4,RP11-383J24.5,RP11-384K6.6,RP11-38J22.6,RP11-390P2.4,RP11-403I13.4,RP11-43D2.6,RP11-453E17.1,RP11-461L13.3,RP11-464F9.1,RP11-467L20.9,RP11-474P12.5,RP11-477D19.2,RP11-506M13.3,RP11-540O11.1,RP11-543D5.2,RP11-549J18.1,RP11-54O7.1,RP11-588K22.2,RP11-60I3.5,RP11-64K12.2,RP11-66B24.4,RP11-677M14.3,RP11-690G19.3,RP11-697M17.1,RP11-773D16.1,RP11-869B15.1,RP11-91G21.2,RP11-923I11.1,RP11-96D1.10,RP11-973H7.2,RP11-983P16.4,RP1-283E3.8,RP1-310O13.12,RP13-507I23.1,RP3-341D10.4,RP3-486L4.3,RP4-614O4.11,RP4-773N10.5,RP5-1028K7.2,RP5-1148A21.3,RP5-1172N10.3,RP5-1180C10.2,RP5-955M13.3,RP6-206I17.2,RP6-24A23.7,SCGB1B2P,SEMA3B,SENP3-EIF4A1,SLC37A4,SNHG1,SNHG12,SNHG16,SPPL2B,TRAF3IP2-AS1,TTN-AS1,XIST,XXbac-B461K10.4,XXbac-BPG32J3.20,YLPM1,ZNF518A,ZNRD1-AS1

249

### 250 3.7. miRNA-miRNA interaction

251 Here, it is predicted shown that microRNA are acting as ceRNA for each other's (Figure 8).

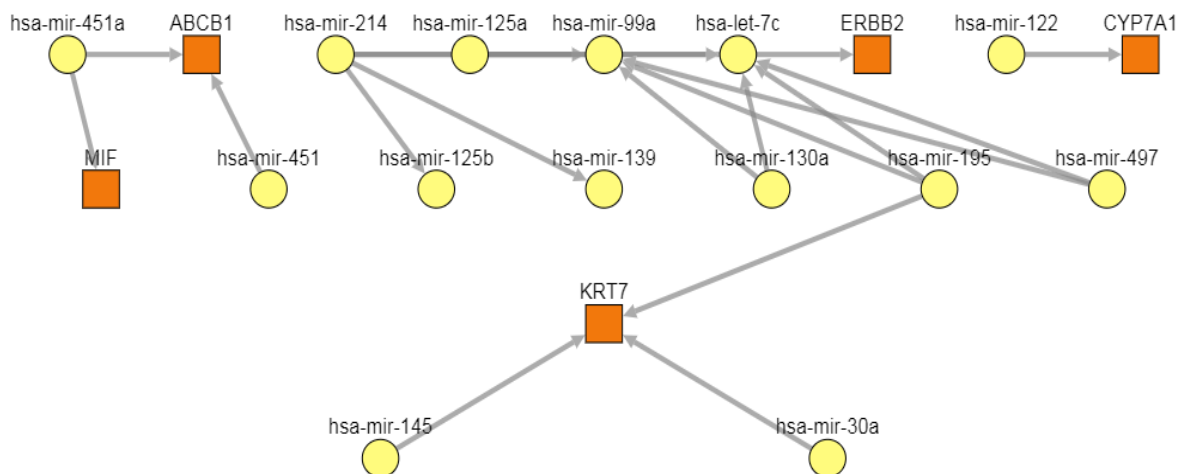

252

253 Figure 8: miRNA-miRNA, PmmR, regulatory interactions with 10 nodes and 19 edges. Here, all  
254 the input microRNAs are supposed to be therapeutically tumor suppressor. However, these  
255 microRNAs acts as a sponge to each other. Consequently, it is putative that this kind of  
256 interaction results in an oncogenic impact.

257 It results in enhancing microRNA regulatory role as tumor suppressor (Fig.7). Seven  
258 miRs show ceRNAs activity.miR-214 acts as sponge for (miR-125a, miR-99a, miR-139, miR-  
259 125b).miR -125a acts as sponge for miR-99a.miR- 99a acts as sponge for let -7c.miR-130a acts  
260 as sponge for (let-7c, mir-99a ).miR 195 acts as sponge for (let-7c, miR-99a).miR-497 acts as  
261 sponge for (let-7c, miR-99a).

### 262 **3.8. microRNA-PPI interaction**

263 Six major biological processes in HCC were resultants (Figure 9). These BP are GO:0051726  
264 regulation of cell cycle, GO:0071158 positive regulation of cell cycle arrest, GO:1901991  
265 negative regulation of mitotic cell cycle phase transition, GO:0040008 regulation of growth,  
266 GO:0042981 regulation of the apoptotic process, GO:0043066: Negative regulation of the  
267 apoptotic process. As shown in table 3, GO:0051726 (regulation of cell cycle) BP has 30 genes  
268 as targets for ten down expressed miRNAs in HCC. Because activation of the cell cycle is one of  
269 the major hallmarks of liver cancer. Hence, suppressing the cell cycle by miRNAs results in  
270 considering that activity as miRNA tumor suppressor. On the other hand, GO:0071158 (positive  
271 regulation of cell cycle arrest), GO:1901991 (negative regulation of mitotic cell cycle phase  
272 transition), GO:0042981 (regulation of apoptotic process) BPs have 7, 15, 27 genes,  
273 respectively, which are non-incorporated in HCC. It is because GO:0071158, GO:1901991, and  
274 GO:0042981 BPs are not hallmarks of causing liver cancer. Therefore, suppression of  
275 GO:0071158 by miRNAs results in oncogenic aspects.

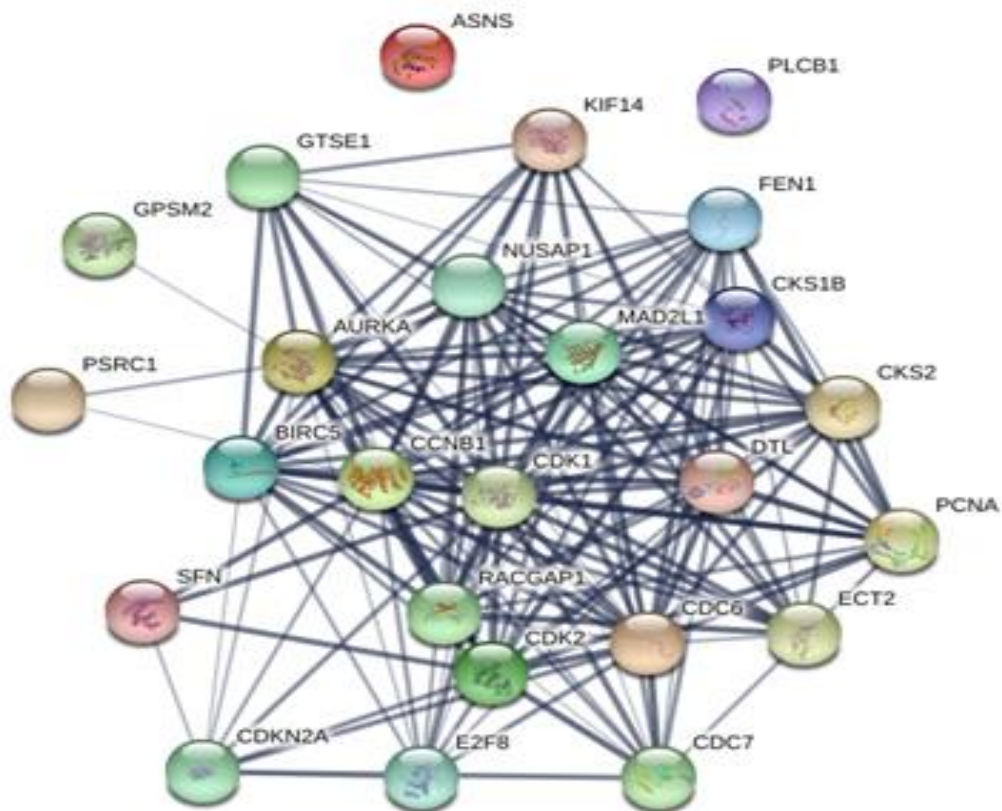

GO:0051726 regulation of cell cycle

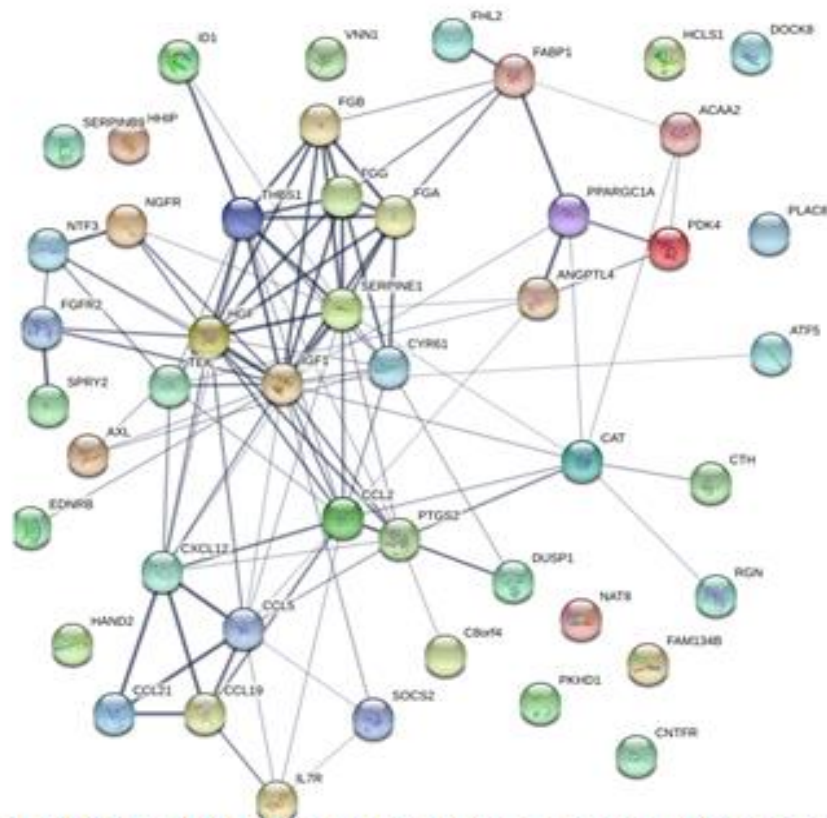

GO:0043066 Negative regulation of apoptotic process

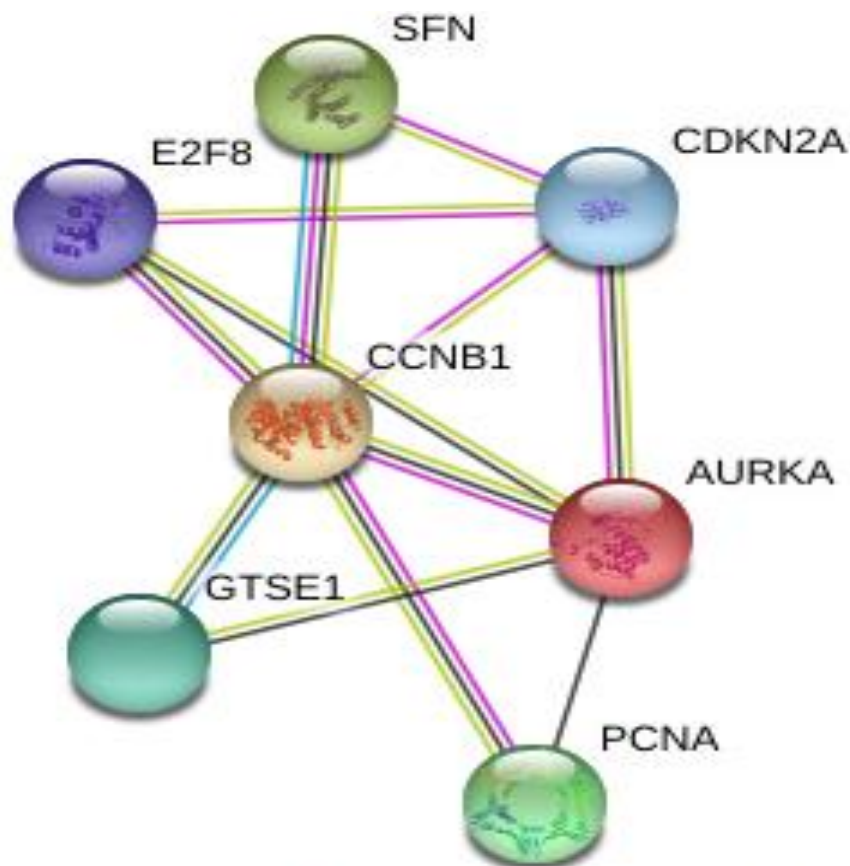

GO:0071158 positive regulation of cell cycle arrest



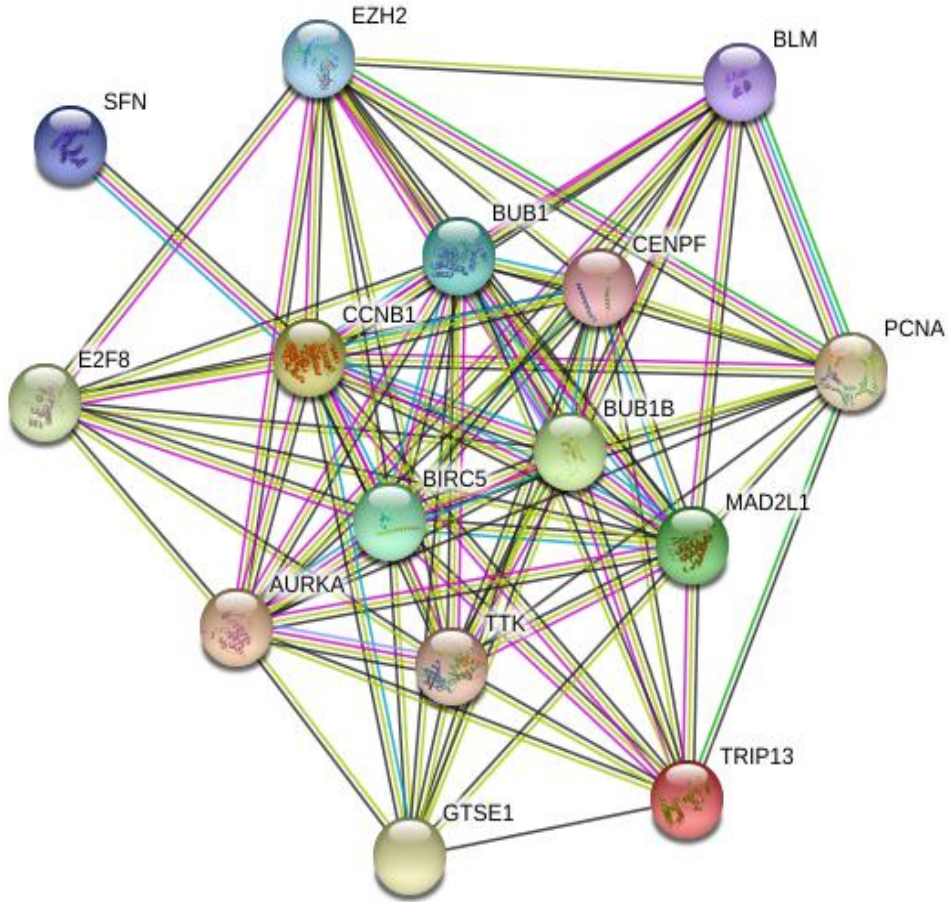

279

GO:1901991 negative regulation of mitotic cell cycle phase transition

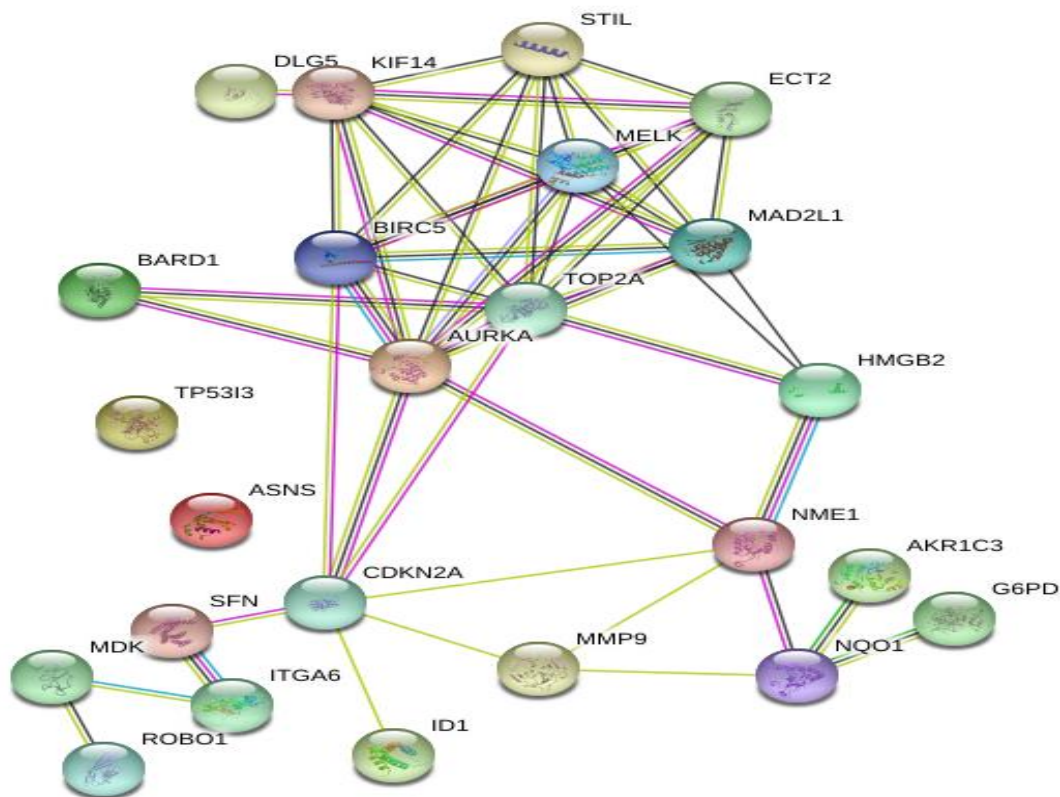

280

GO:0042981 regulation of apoptotic process

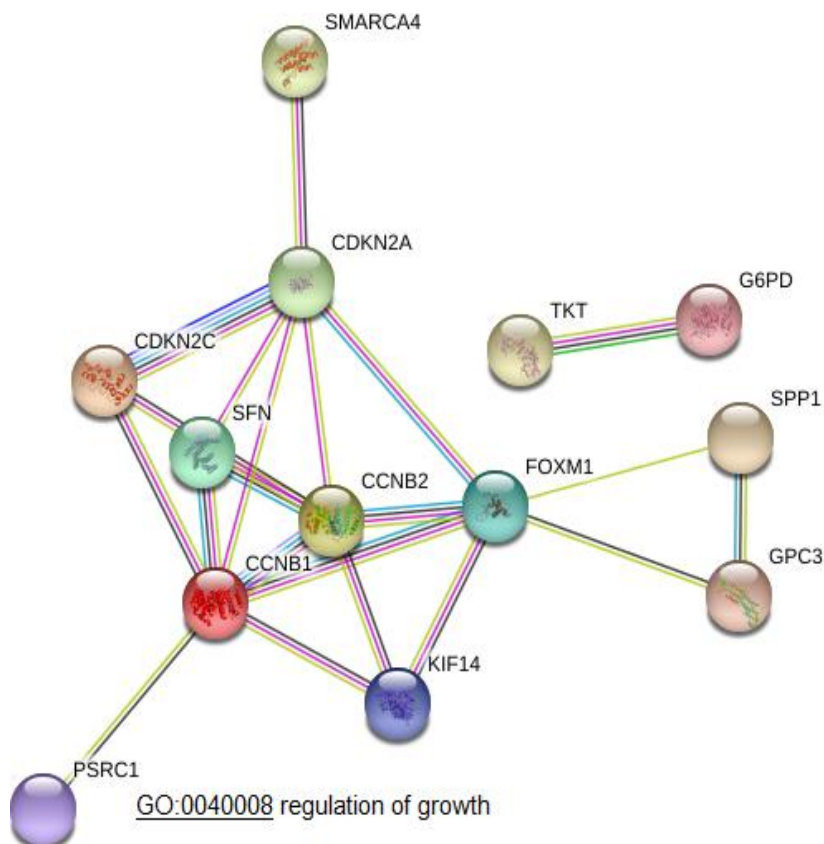

281

GO:0040008 regulation of growth

282 Figure 9 shows biological processes retrieved from PPI network of 180 overexpressed genes and  
 283 572 down expressed genes in HCC.PPI network was analyzed by STRING.

284 **Table 3:** Illustration of the Biological process of PPI network and their matched microRNAs

| Biological Process                                                       | microRNAs                                                                                                                          | Gene Target                                                                                                                                             | Therapeutic effect of microRNA-PPI on HCC. |
|--------------------------------------------------------------------------|------------------------------------------------------------------------------------------------------------------------------------|---------------------------------------------------------------------------------------------------------------------------------------------------------|--------------------------------------------|
| GO:0051726<br>regulation of cell cycle                                   | hsa-mir-30a-5p<br>hsa-mir-130a-3p<br>hsa-miR-30e-5p<br>hsa-mir-497-5p<br>sa-mir-122-5p<br>hsa-mir-223<br>hsa-let-7c<br>hsa-mir-215 | CDC7, DTL, PCNA<br>RACGAP1<br>CDC7<br>BIRC5, CDK1, RACGAP1<br>BIRC5<br>CDK2,ECT2,E2F8,E2F8,E2F8,PLCB1<br>CKS2<br>CDC7,CDKN2A,DTL,E2F8,ECT2,FEN1,GPSM2   | Tumor supressor                            |
| GO:0071158<br>positive regulation of cell cycle arrest                   | hsa-mir-195-5p<br>hsa-mir-125b-5p                                                                                                  | KIF14,MAD2L1,PSRC1,RACGAP1<br>BIRC5,CDK1<br>CDKN2A                                                                                                      | Onco-miR                                   |
| GO:1901991<br>negative regulation of mitotic cell cycle phase transition |                                                                                                                                    | AURKA,BIRC5,BLM,BUB1,BUB1B,CCNB1,CENPF,E2F8,EZH2,GTSE1,MAD2L1,PCNA,SFN,TRIP13,TTK                                                                       | Onco-miR                                   |
| GO:0040008<br>regulation of growth                                       |                                                                                                                                    | ACSL4,CCNB1,CCNB2,CDKN2A,CDKN2C,FOXM1,G6PD,GPC3,KIF14,NDRG3,PLCB1,PSRC1,SFN,SMARCA4,SPP1,TKT                                                            | Tumor supressor                            |
| GO:0042981<br>regulation of apoptotic process                            |                                                                                                                                    | AKR1C3,ASNS,AURKA,BARD1,BIRC5,CDKN2A,DLG5,ECT2,G6PD,HMGB2,ID1,IRAK1,ITGA6,KIF14,MAD2L1,MDK,MELK,MMP9,NME1,NQO1,PEA15,ROBO1,SFN,SORT1,STIL, TOP2A,TP53I3 | Onco-miR                                   |

GO:0043066:

Negative regulation of apoptotic process

of hsa-mir-145-5p  
hsa-mir-122-5p  
hsa-mir-375

ACAA2,ANGPTL4,ATF5,AXL,C8orf4,CAT,CC  
L19,CCL2,CCL21,CCL5,CNTFR,CTH,CXCL12,  
CYR61,DOCK8,DUSP1,EDNRB,FABP1,FAM13  
4B,FGA,FGB,FGFR2,FGG,FHL2,HAND2,HCLS  
1,HGF,HHIP,ID1,IGF1,IL7R,NAT8,NGFR,NTF3  
,PDK4,PKHD1,PLAC8,PPARGC1A,PTGS2,RG  
N,SERPINB9,SERPINE1,SOCS2,SPRY2,TEK,T  
HBS1,VNN1  
SERPINE1  
AXL, FHL2  
AXL

Tumor suppressor

285

### 286 3.9. Free survival analysis

287 Here, survival analysis shows us that ectopic expression of ( CCNB1, AURKA, BIRC5,  
288 HGF, IGF1, TOP2A) has poor survival progression in the long term in LIHC( Figure 10). It  
289 means that microRNA acting on these genes is non-additive value for curing HCC in the long  
290 term.

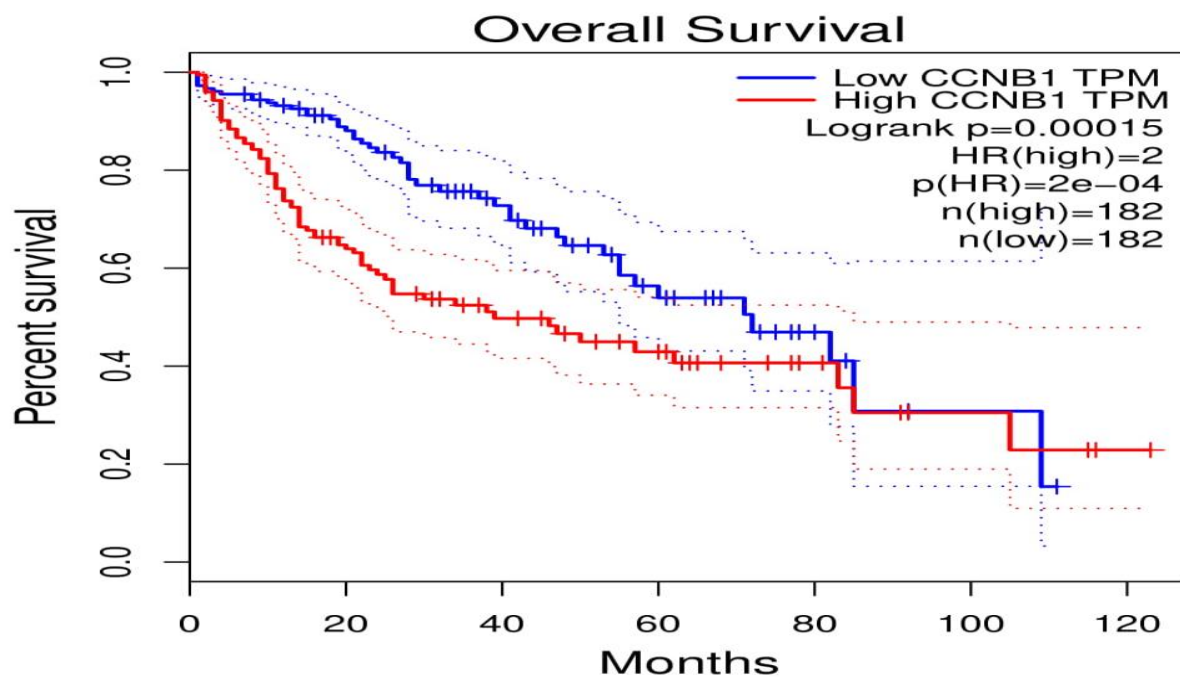

291 1.

292

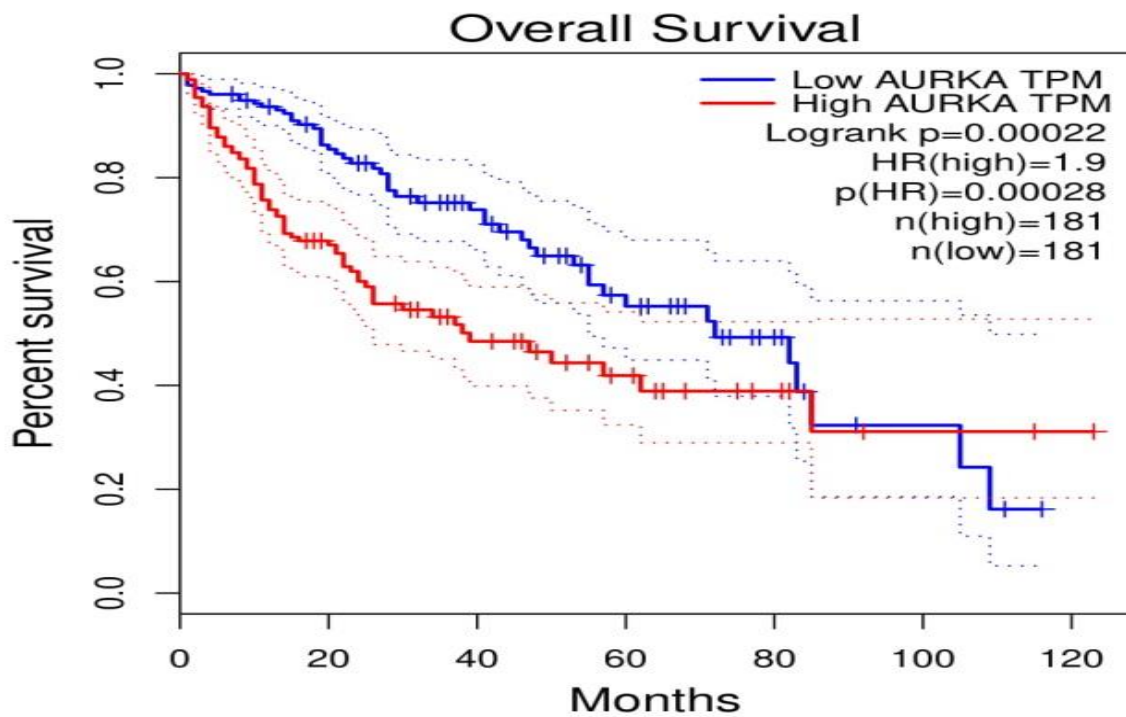

293  
294

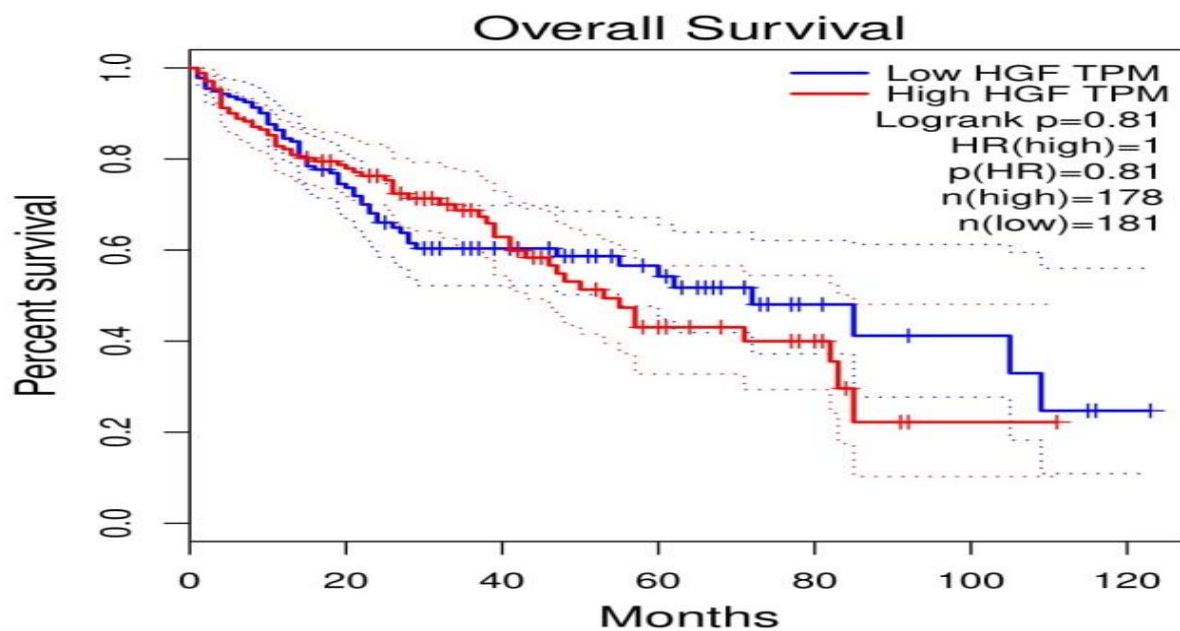

295  
296

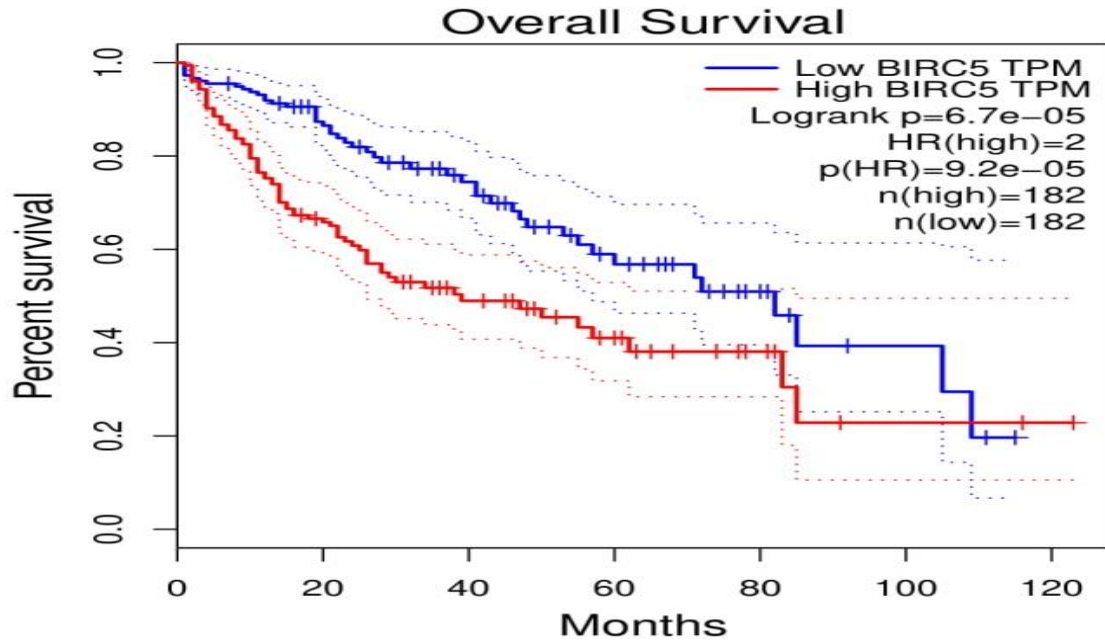

297  
298

Figure 10: list of survival figures of the gene target.

299 **4. Discussion**

300 MicroRNAs are a promising therapeutic gene therapy for Cancer (Table 4).

301 **Table 4:** list of miRNAs as HCC therapy.

| MicroRNA    | Target     | Pathway       | Suppression<br>or<br>Activation activity of<br>miRNA |
|-------------|------------|---------------|------------------------------------------------------|
| miR-142     | TGF-Beta   | mTOR          | Suppression                                          |
| miR-199b-5p | TGF-Beta 1 |               |                                                      |
| mir-139-5p  | PDK1       |               |                                                      |
| miR-223     | Rab1       |               |                                                      |
| miR-195     | AEG-1      | Wnt signaling | Suppression                                          |
| miR-214-3p  | PIM-1      | JAK-STAT      | Suppression                                          |

---

|             |             |              |             |
|-------------|-------------|--------------|-------------|
| mIR-200     | Pin1        |              |             |
| miR-199a-5p | MAP4K3      |              |             |
| miR-143     | GATA6       | MAPK cascade | Suppression |
| miR-125A    | MMP11,SIRT7 |              |             |
| miR-200a    | GAB1        |              |             |

---

302  
303 They are involved in regulating many biological processes. Their ability to bind with 3' un-  
304 translated region of mRNAs recruit many factors to degrade mRNAs , consequently acting as a  
305 repressor for oncoprotein synthesis [48, 49] . It results in knocking down the pathologically  
306 causative genes of Cancer [50] (Table 3). However, they have putatively mysterious functions of  
307 acting through inversely dual role either as a tumor suppressor or oncomiR. Through our current  
308 work, we tried to uncover the dual role of a set of microRNAs in HCC. MicroRNAs, on the  
309 contrary to siRNAs, lack specificity to bind mRNAs, where MicroRNAs have binding seed  
310 regions with a high capacity to target multiple genes [51]. It is considered a drawback in  
311 microRNAs as an approach to gene therapy. It is experimentally invalid to target specific  
312 oncogenes to be knocked down by microRNA where microRNAs target tumor suppressor genes,  
313 off-targets, that result in activating cancerous biological processes. To uncover these dually  
314 mysterious microRNA functions, we have collected the common down- expressed genes of  
315 miRNAs HCC within different GEO and TCGA-LIHC databases. The chosen databases are for  
316 (HCC vs. cirrhotic non-cancer) and (G2/M phase of the cell cycle in vs. normal tissues) to cover  
317 different pathological stages of HCC.

318 Additionally, these datasets cover broad samples (446 HCC vs. 146 normal specimens).In this  
319 respect, we targeted only the microRNAs common in all the chosen datasets due to the  
320 inconsistency of the results as miRNA measurement technology is immature compared to gene  
321 expression's system where CapitalBio's is the least reliable dataset. Milteny's and TCGA's  
322 datasets generated the most consistent results. Affymetrix's arrays are weak in detecting the  
323 expression difference. Hence, we decided to integrate these datasets to get the common down-  
324 expressed miRNAs to ensure accuracy.

325 Our work aims to support the combinatorial therapy of microRNA. One technique activates  
326 the tumor suppressor genes, off-target genes, via designing a cassette of miRNA-guide RNA-  
327 CRISPR/Cas9 [52]. Maybe CRISPRa is a choice to be combined with microRNA to activate

328 these off-targets genes knocked down by microRNAs. An additional suggestion is to combine  
329 microRNA with an exogenous expression vector carrying the tumor suppressor genes. Also,  
330 combined tumor suppressor microRNA with those microRNAs that activate tumor suppressor  
331 genes via binding its 5'UTR is a third way to solve the drawback of microRNAs' dual role [53].  
332 The idea behind our suggested combinatorial therapy is that it helps most in increasing the level  
333 of expressed tumor suppressor genes within the cells.

334 Moreover; microRNA cocktail therapy should not be a combination of microRNAs which act as  
335 CeRNA for each other [54]. One example of the dual role of microRNAs is "how microRNAs  
336 regulate dually in colorectal cancer?"; It was reported that miRNAs show dual regulatory roles in  
337 colorectal Cancer [55]. In a wet lab, much microRNAs act dually. miR-375 shows dual  
338 functions in prostate cancer [56]. In Breast cancer, miR-181a acts as an onco-miR via targeting  
339 Bax, increasing metastasis. On the other hand, it acts as a tumor suppressor via targeting BCL-  
340 increasing apoptosis [57].



341 The final regulatory role of microRNA is evaluated by miRNA-LncRNA-mRNA-TFs  
 342 Crosstalk as an accumulative impact on how microRNA acts (Figure 11).

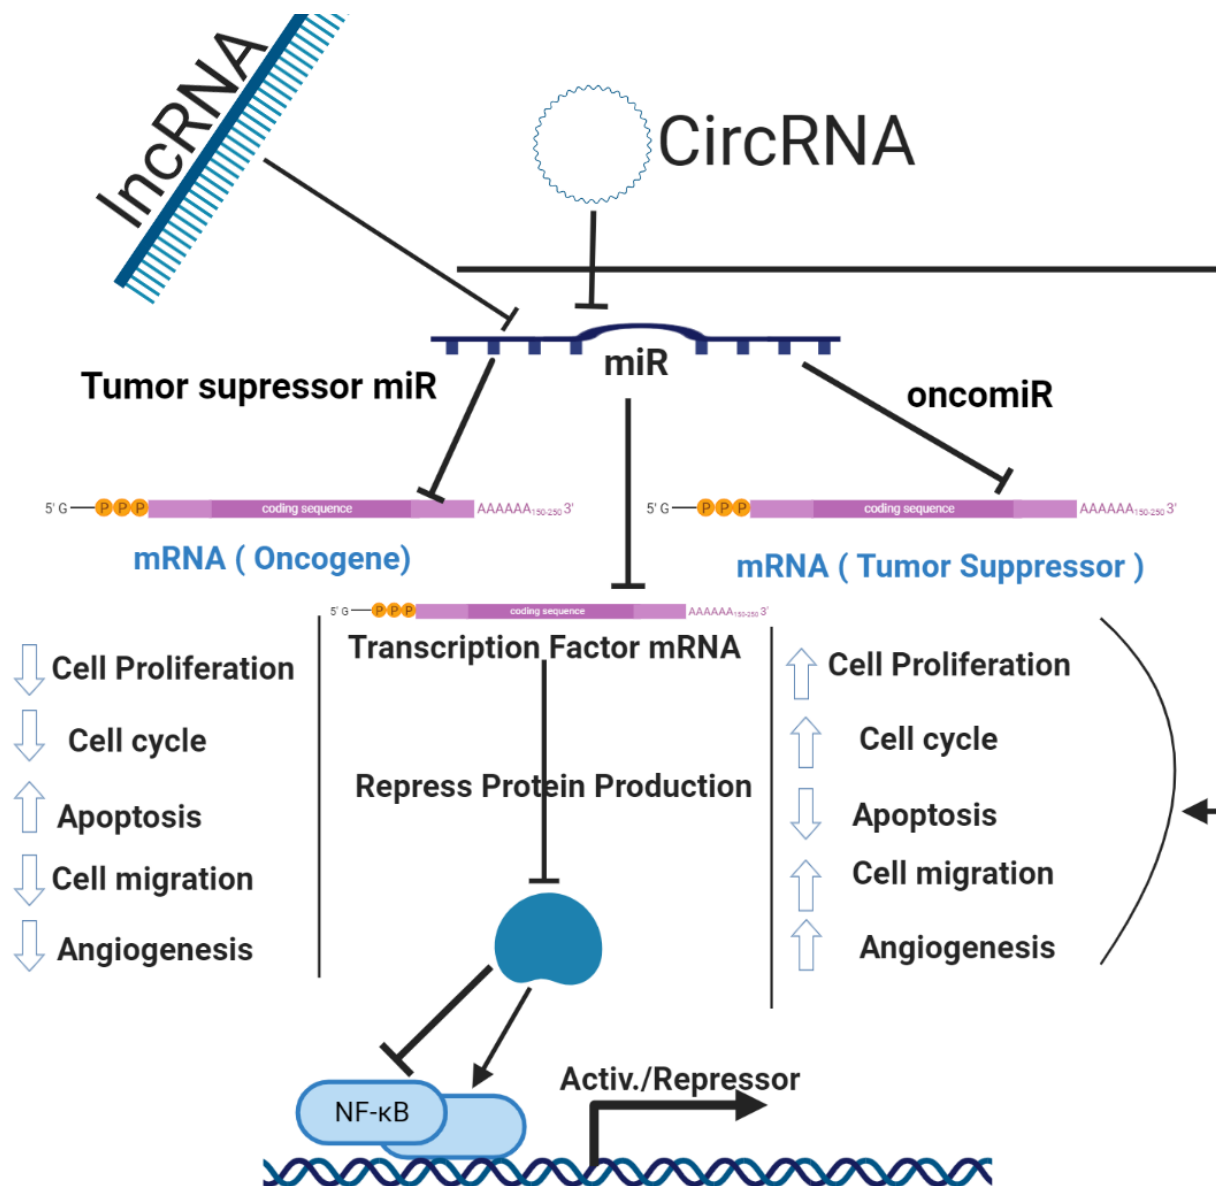

343  
 344 Figure11: Regulatory role of microRNA as either oncomiR and/ or tumor suppressor miR.

345 LncRNA is 200 nt, acting as epigenetic regulators and as competing RNA for microRNA.  
 346 It results in decreasing in the affinity of microRNA to be available for mRNA. Subsequently, it is  
 347 predicted to alter microRNA regulatory role shifting it to be oncomiR for down expressed  
 348 miRNAs in Cancer. On the other hand, transcription factors act via either activator or suppressor

349 for the genes. So, microRNA acting on TFs results in either enhancing its tumor suppressor  
350 activity or shifting into being oncomiR. It is based on the ontology of the gene where TF targets.

351 Through our work, we concluded that microRNAs are incorporated in most hallmarks of  
352 hepatocellular carcinoma. However, these microRNAs' dual activity made the consideration of  
353 the dominance of one of both functions a tough decision. Hence, we strongly suggest that more  
354 investigations on the factors that affect which microRNA function types will predominate should  
355 be carried out to solve their Myth. We suggest enhancing the protocols of using microRNAs as a  
356 gene therapy by combing activating techniques with miRs. These activating techniques are to  
357 induce the tumor suppressor genes targeted by microRNAs.

### 358 **Conflict of Interest**

359 The authors declare that there are no conflicts of interest regarding the publication of this paper.

### 360 **Authors' Contributions**

361 Mahmoud M. Tolba, Bangli Soliman and Mahmoud Elhefnawi designed this project. Mahmoud  
362 M. Tolba and HebaT'Allah Nasser conducted the reseach. Mahmoud M. Tolba, Abdul Jabbar  
363 edited the manuscript. Mahmoud M. tolba designed the figures.

364

### 365 **References**

- 366 1. A. Roberti, A. F. Valdes, R. Torrecillas, M. F. Fraga and A. F. J. C. e. Fernandez, "Epigenetics  
367 in cancer therapy and nanomedicine," vol. 11, no. 1, pp. 1-18, 2019.
- 368 2. S. Heerboth, K. Lapinska, N. Snyder, M. Leary, S. Rollinson and S. Sarkar, "Use of epigenetic  
369 drugs in disease: an overview. Genet Epigenet. 2014; 6: 9–19," Ed.
- 370 3. J. O'Brien, H. Hayder and Y. Zayed, "Overview of microRNA biogenesis, mechanisms of  
371 actions, and circulation, Front. Endocrinol., 2018, vol. 9, no. 402," Ed., 2018.
- 372 4. A. Wittrup and J. J. N. R. G. Lieberman, "Knocking down disease: a progress report on siRNA  
373 therapeutics," vol. 16, no. 9, pp. 543-552, 2015.
- 374 5. R.-W. Yao, Y. Wang and L.-L. J. N. c. b. Chen, "Cellular functions of long noncoding RNAs,"  
375 vol. 21, no. 5, pp. 542-551, 2019.
- 376 6. Y. A. Fouad and C. J. A. j. o. c. r. Aanei, "Revisiting the hallmarks of cancer," vol. 7, no. 5,  
377 pp. 1016, 2017.
- 378 7. N. M. Tunissiolli, M. M. U. Castanhole-Nunes, P. M. Biselli-Chicote, É. C. Pavarino and R. F.  
379 J. A. P. j. o. c. p. A. da Silva, "Hepatocellular carcinoma: a comprehensive review of biomarkers,  
380 clinical aspects, and therapy," vol. 18, no. 4, pp. 863, 2017.
- 381 8. T. El Jabbour, S. M. Lagana and H. J. W. j. o. g. Lee, "Update on hepatocellular carcinoma:  
382 Pathologists' review," vol. 25, no. 14, pp. 1653, 2019.

- 383 9. P. Golabi, S. Fazel, M. Otgonsuren, M. Sayiner, C. T. Locklear and Z. M. J. M. Younossi,  
384 "Mortality assessment of patients with hepatocellular carcinoma according to underlying disease  
385 and treatment modalities," vol. 96, no. 9, 2017.
- 386 10. L. P. Waller, V. Deshpande and N. J. W. j. o. h. Pysopoulos, "Hepatocellular carcinoma: A  
387 comprehensive review," vol. 7, no. 26, pp. 2648, 2015.
- 388 11. D. Dimitroulis, C. Damaskos, S. Valsami, S. Davakis, N. Garmpis, E. Spartalis, A.  
389 Athanasiou, D. Moris, S. Sakellariou and S. J. W. j. o. g. Kykalos, "From diagnosis to treatment  
390 of hepatocellular carcinoma: An epidemic problem for both developed and developing world,"  
391 vol. 23, no. 29, pp. 5282, 2017.
- 392 12. F. Vasuri, M. Visani, G. Acquaviva, T. Brand, M. Fiorentino, A. Pession, G. Tallini, A.  
393 D'Errico and D. J. W. j. o. g. de Biase, "Role of microRNAs in the main molecular pathways of  
394 hepatocellular carcinoma," vol. 24, no. 25, pp. 2647, 2018.
- 395 13. R. C. Lee, R. L. Feinbaum and V. J. c. Ambros, "The *C. elegans* heterochronic gene *lin-4*  
396 encodes small RNAs with antisense complementarity to *lin-14*," vol. 75, no. 5, pp. 843-854,  
397 1993.
- 398 14. H. Ling, M. Fabbri and G. A. J. N. r. D. d. Calin, "MicroRNAs and other non-coding RNAs  
399 as targets for anticancer drug development," vol. 12, no. 11, pp. 847-865, 2013.
- 400 15. K. Felekis, E. Touvana, C. Stefanou and C. J. H. Deltas, "microRNAs: a newly described  
401 class of encoded molecules that play a role in health and disease," vol. 14, no. 4, pp. 236, 2010.
- 402 16. F. Zhang and D. J. G. Wang, "The pattern of microRNA binding site distribution," vol. 8, no.  
403 11, pp. 296, 2017.
- 404 17. K. C. Miranda, T. Huynh, Y. Tay, Y.-S. Ang, W.-L. Tam, A. M. Thomson, B. Lim and I. J.  
405 C. Rigoutsos, "A pattern-based method for the identification of MicroRNA binding sites and  
406 their corresponding heteroduplexes," vol. 126, no. 6, pp. 1203-1217, 2006.
- 407 18. M. M. Chong, G. Zhang, S. Cheloufi, T. A. Neubert, G. J. Hannon, D. R. J. G. Littman and  
408 development, "Canonical and alternate functions of the microRNA biogenesis machinery," vol.  
409 24, no. 17, pp. 1951-1960, 2010.
- 410 19. L.-A. MacFarlane and P. J. C. g. R. Murphy, "MicroRNA: biogenesis, function and role in  
411 cancer," vol. 11, no. 7, pp. 537-561, 2010.
- 412 20. J. O'Brien, H. Hayder, Y. Zayed and C. J. F. i. e. Peng, "Overview of microRNA biogenesis,  
413 mechanisms of actions, and circulation," vol. 9, pp. 402, 2018.
- 414 21. J. Krol, I. Loedige and W. J. N. R. G. Filipowicz, "The widespread regulation of microRNA  
415 biogenesis, function and decay," vol. 11, no. 9, pp. 597-610, 2010.
- 416 22. G. J. Gordon, *Bioinformatics in cancer and cancer therapy*, Springer Science & Business  
417 Media, 2008.
- 418 23. Á. L. Riffo-Campos, I. Riquelme and P. J. I. j. o. m. s. Brebi-Mieville, "Tools for sequence-  
419 based miRNA target prediction: what to choose?," vol. 17, no. 12, pp. 1987, 2016.
- 420 24. P. Loher and I. J. B. Rigoutsos, "Interactive exploration of RNA22 microRNA target  
421 predictions," vol. 28, no. 24, pp. 3322-3323, 2012.
- 422 25. I. S. Vlachos and A. G. Hatzigeorgiou, "Functional analysis of miRNAs using the DIANA  
423 tools online suite," in *Drug Target miRNA*, Ed., pp. 25-50, Springer, 2017.
- 424 26. D. Betel, A. Koppal, P. Agius, C. Sander and C. J. G. b. Leslie, "Comprehensive modeling of  
425 microRNA targets predicts functional non-conserved and non-canonical sites," vol. 11, no. 8, pp.  
426 1-14, 2010.
- 427 27. J. Jarroux, A. Morillon and M. J. L. N. C. R. B. Pinskaya, "History, discovery, and  
428 classification of lncRNAs," pp. 1-46, 2017.

- 429 28. T. Mitsis, A. Efthimiadou, F. Bacopoulou, D. Vlachakis, G. P. Chrousos and E. J. W. A. o. S.  
430 J. Eliopoulos, "Transcription factors and evolution: an integral part of gene expression," vol. 2,  
431 no. 1, pp. 3-8, 2020.
- 432 29. S. A. J. B. Teichmann, "Principles of protein-protein interactions," vol. 18, no. suppl\_2, pp.  
433 S249-S249, 2002.
- 434 30. J. B. Berletch, F. Yang and C. M. J. G. b. Disteché, "Escape from X inactivation in mice and  
435 humans," vol. 11, no. 6, pp. 1-7, 2010.
- 436 31. E. Clough and T. Barrett, "The gene expression omnibus database," in *Statistical genomics*,  
437 Ed., pp. 93-110, Springer, 2016.
- 438 32. Barrett T. Gene Expression Omnibus (GEO) 2013 May 19. In: The NCBI Handbook  
439 [Internet]. 2nd edition. Bethesda (MD): National Center for Biotechnology Information (US);  
440 2013-. "<https://www.ncbi.nlm.nih.gov/books/NBK159736/>."
- 441 33. A. Ruepp, A. Kowarsch, D. Schmidl, F. Buggenthin, B. Brauner, I. Dunger, G. Fobo, G.  
442 Frishman, C. Montrone and F. J. J. G. b. Theis, "PhenomiR: a knowledgebase for microRNA  
443 expression in diseases and biological processes," vol. 11, no. 1, pp. 1-11, 2010.
- 444 34. S. Griffiths-Jones, H. K. Saini, S. Van Dongen and A. J. J. N. a. r. Enright, "miRBase: tools  
445 for microRNA genomics," vol. 36, no. suppl\_1, pp. D154-D158, 2007.
- 446 35. A. Kozomara and S. J. N. a. r. Griffiths-Jones, "miRBase: integrating microRNA annotation  
447 and deep-sequencing data," vol. 39, no. suppl\_1, pp. D152-D157, 2010.
- 448 36. H. Dweep, C. Sticht, P. Pandey and N. J. J. o. b. i. Gretz, "miRWalk–database: prediction of  
449 possible miRNA binding sites by “walking” the genes of three genomes," vol. 44, no. 5, pp. 839-  
450 847, 2011.
- 451 37. J. Krüger and M. J. N. a. r. Rehmsmeier, "RNAhybrid: microRNA target prediction easy, fast  
452 and flexible," vol. 34, no. suppl\_2, pp. W451-W454, 2006.
- 453 38. B. Fromm, T. Billipp, L. E. Peck, M. Johansen, J. E. Tarver, B. L. King, J. M. Newcomb, L.  
454 F. Sempere, K. Flatmark and E. J. A. r. o. g. Hovig, "A uniform system for the annotation of  
455 vertebrate microRNA genes and the evolution of the human microRNAome," vol. 49, pp. 213-  
456 242, 2015.
- 457 39. I. S. Vlachos, M. D. Paraskevopoulou, D. Karagkouni, G. Georgakilas, T. Vergoulis, I.  
458 Kanellos, I.-L. Anastasopoulos, S. Maniou, K. Karathanou and D. J. N. a. r. Kalfakakou,  
459 "DIANA-TarBase v7. 0: indexing more than half a million experimentally supported miRNA:  
460 mRNA interactions," vol. 43, no. D1, pp. D153-D159, 2015.
- 461 40. H.-Y. Huang, Y.-C.-D. Lin, J. Li, K.-Y. Huang, S. Shrestha, H.-C. Hong, Y. Tang, Y.-G.  
462 Chen, C.-N. Jin and Y. J. N. a. r. Yu, "miRTarBase 2020: updates to the experimentally validated  
463 microRNA–target interaction database," vol. 48, no. D1, pp. D148-D154, 2020.
- 464 41. B. T. Sherman and R. A. J. N. p. Lempicki, "Systematic and integrative analysis of large  
465 gene lists using DAVID bioinformatics resources," vol. 4, no. 1, pp. 44, 2009.
- 466 42. P. Shannon, A. Markiel, O. Ozier, N. S. Baliga, J. T. Wang, D. Ramage, N. Amin, B.  
467 Schwikowski and T. J. G. r. Ideker, "Cytoscape: a software environment for integrated models of  
468 biomolecular interaction networks," vol. 13, no. 11, pp. 2498-2504, 2003.
- 469 43. Y. Fan, K. Siklenka, S. K. Arora, P. Ribeiro, S. Kimmins and J. J. N. a. r. Xia, "miRNet-  
470 dissecting miRNA-target interactions and functional associations through network-based visual  
471 analysis," vol. 44, no. W1, pp. W135-W141, 2016.
- 472 44. M. Hamed, C. Spaniol, M. Nazarieh and V. J. N. a. r. Helms, "TFmiR: a web server for  
473 constructing and analyzing disease-specific transcription factor and miRNA co-regulatory  
474 networks," vol. 43, no. W1, pp. W283-W288, 2015.

- 475 45. D. Sengupta and S. J. M. B. Bandyopadhyay, "Participation of microRNAs in human  
476 interactome: extraction of microRNA–microRNA regulations," vol. 7, no. 6, pp. 1966-1973,  
477 2011.
- 478 46. D. Szklarczyk, A. Franceschini, S. Wyder, K. Forslund, D. Heller, J. Huerta-Cepas, M.  
479 Simonovic, A. Roth, A. Santos and K. P. J. N. a. r. Tsafou, "STRING v10: protein–protein  
480 interaction networks, integrated over the tree of life," vol. 43, no. D1, pp. D447-D452, 2015.
- 481 47. Z. Tang, C. Li, B. Kang, G. Gao, C. Li and Z. J. N. a. r. Zhang, "GEPIA: a web server for  
482 cancer and normal gene expression profiling and interactive analyses," vol. 45, no. W1, pp.  
483 W98-W102, 2017.
- 484 48. C. M. Ferreira, I. S. Pinto, E. V. Soares and H. M. J. R. A. Soares, "(Un) suitability of the use  
485 of pH buffers in biological, biochemical and environmental studies and their interaction with  
486 metal ions—a review," vol. 5, no. 39, pp. 30989-31003, 2015.
- 487 49. W. Ji, B. Sun and C. J. G. Su, "Targeting microRNAs in cancer gene therapy," vol. 8, no. 1,  
488 pp. 21, 2017.
- 489 50. X. Xu, Y. Tao, L. Shan, R. Chen, H. Jiang, Z. Qian, F. Cai, L. Ma and Y. J. J. o. C. Yu, "The  
490 role of MicroRNAs in hepatocellular carcinoma," vol. 9, no. 19, pp. 3557, 2018.
- 491 51. T. Ahmadzade, G. Reid and D. R. J. B. r. McKenzie, "Fundamentals of siRNA and miRNA  
492 therapeutics and a review of targeted nanoparticle delivery systems in breast cancer," vol. 10, no.  
493 1, pp. 69-86, 2018.
- 494 52. H. A. Seo, S. Moeng, S. Sim, H. J. Kuh, S. Y. Choi and J. K. J. C. Park, "MicroRNA-based  
495 combinatorial cancer therapy: effects of MicroRNAs on the efficacy of anti-cancer therapies,"  
496 vol. 9, no. 1, pp. 29, 2020.
- 497 53. I. Lee, S. S. Ajay, J. I. Yook, H. S. Kim, S. H. Hong, N. H. Kim, S. M. Dhanasekaran, A. M.  
498 Chinnaiyan and B. D. J. G. r. Athey, "New class of microRNA targets containing simultaneous  
499 5'-UTR and 3'-UTR interaction sites," vol. 19, no. 7, pp. 1175-1183, 2009.
- 500 54. X. Qi, D.-H. Zhang, N. Wu, J.-H. Xiao, X. Wang and W. J. J. o. m. g. Ma, "ceRNA in  
501 cancer: possible functions and clinical implications," vol. 52, no. 10, pp. 710-718, 2015.
- 502 55. L. Ding, Z. Lan, X. Xiong, H. Ao, Y. Feng, H. Gu, M. Yu and Q. J. I. j. o. m. s. Cui, "The  
503 dual role of microRNAs in colorectal cancer progression," vol. 19, no. 9, pp. 2791, 2018.
- 504 56. P. Costa-Pinheiro, J. Ramalho-Carvalho, F. Q. Vieira, J. Torres-Ferreira, J. Oliveira, C. S.  
505 Gonçalves, B. M. Costa, R. Henrique and C. J. C. e. Jerónimo, "MicroRNA-375 plays a dual role  
506 in prostate carcinogenesis," vol. 7, no. 1, pp. 1-14, 2015.
- 507 57. C. Yang, S. N. Tabatabaei, X. Ruan, P. J. C. P. Hardy and Biochemistry, "The dual  
508 regulatory role of MiR-181a in breast cancer," vol. 44, no. 3, pp. 843-856, 2017.
